# Supplementary material for: Syntheses of fluorooxindole and 2-fluoro-2-arylacetic acid derivatives from diethyl 2-fluoromalonate ester
Source: PubMed Central journal article supplement (PMC4077372; doi:10.3762/bjoc.10.119), 2014-05-22

# Supporting Information File 2

for

## Syntheses of fluorooxindole and 2-fluoro-2-arylacetic acid derivatives from diethyl 2-fluoromalonate ester

Antal Harsanyi<sup>1</sup>, Graham Sandford<sup>1\*</sup>, Dmitri S. Yufit<sup>2</sup> and Judith A.K. Howard<sup>2</sup>

Address: <sup>1</sup>Department of Chemistry, Durham University, South Road, Durham, DH1 3LE, U.K, <sup>2</sup>Chemical Crystallography, Department of Chemistry, Durham University, South Road, Durham, DH1 3LE, U.K.

Email: Graham Sandford - graham.sandford@durham.ac.uk

\*Corresponding author

## NMR spectra

|                                                                       |     |
|-----------------------------------------------------------------------|-----|
| Diethyl 2-fluoro-2-(2-nitrophenyl)malonate ( <b>3</b> )               | S3  |
| 2-Fluoro-2-(2-nitrophenyl)acetic acid ( <b>4a</b> )                   | S5  |
| 2-Fluoro-2-(2-nitro-4-trifluoromethylphenyl)acetic acid ( <b>4b</b> ) | S7  |
| 2-Fluoro-2-(2-nitro-4-bromophenyl)acetic acid ( <b>4c</b> )           | S9  |
| 2-Fluoro-2-(2,4-dinitrophenyl)acetic acid ( <b>4d</b> )               | S11 |
| 2-Fluoro-2-(2-nitro-5-methoxyphenyl)acetic acid ( <b>4e</b> )         | S13 |

|                                                                          |     |
|--------------------------------------------------------------------------|-----|
| Potassium 2-fluoro-2-(3-nitro-2-pyridinyl)acetate ( <b>4f</b> )          | S15 |
| Methyl 2-fluoro-2-(2-nitrophenyl)acetate ( <b>6a</b> )                   | S17 |
| Methyl 2-fluoro-2-(2-nitro-4-trifluoromethylphenyl)acetate ( <b>6b</b> ) | S19 |
| Methyl 2-fluoro-2-(2-nitro-4-bromophenyl)acetate ( <b>6c</b> )           | S21 |
| Methyl 2-fluoro-2-(2,4-dinitrophenyl)acetate ( <b>6d</b> )               | S23 |
| Methyl 2-fluoro-2-(2-nitro-5-methoxyphenyl)acetate ( <b>6e</b> )         | S25 |
| 3-Fluorooxindole ( <b>8a</b> )                                           | S27 |
| 3-Fluoro-6-trifluoromethyloxindole ( <b>8b</b> )                         | S29 |
| 3-Fluoro-6-bromooxindole ( <b>8c</b> )                                   | S31 |
| 3-Fluoro-5-methoxyoxindole ( <b>8e</b> )                                 | S33 |
| 2,4-Dinitrobenzyl fluoride <b>5</b>                                      | S35 |
| 2-Fluoromethyl-3-nitropyridine ( <b>7</b> )                              | S37 |

# Diethyl 2-fluoro-2-(2-nitrophenyl)malonate (3)

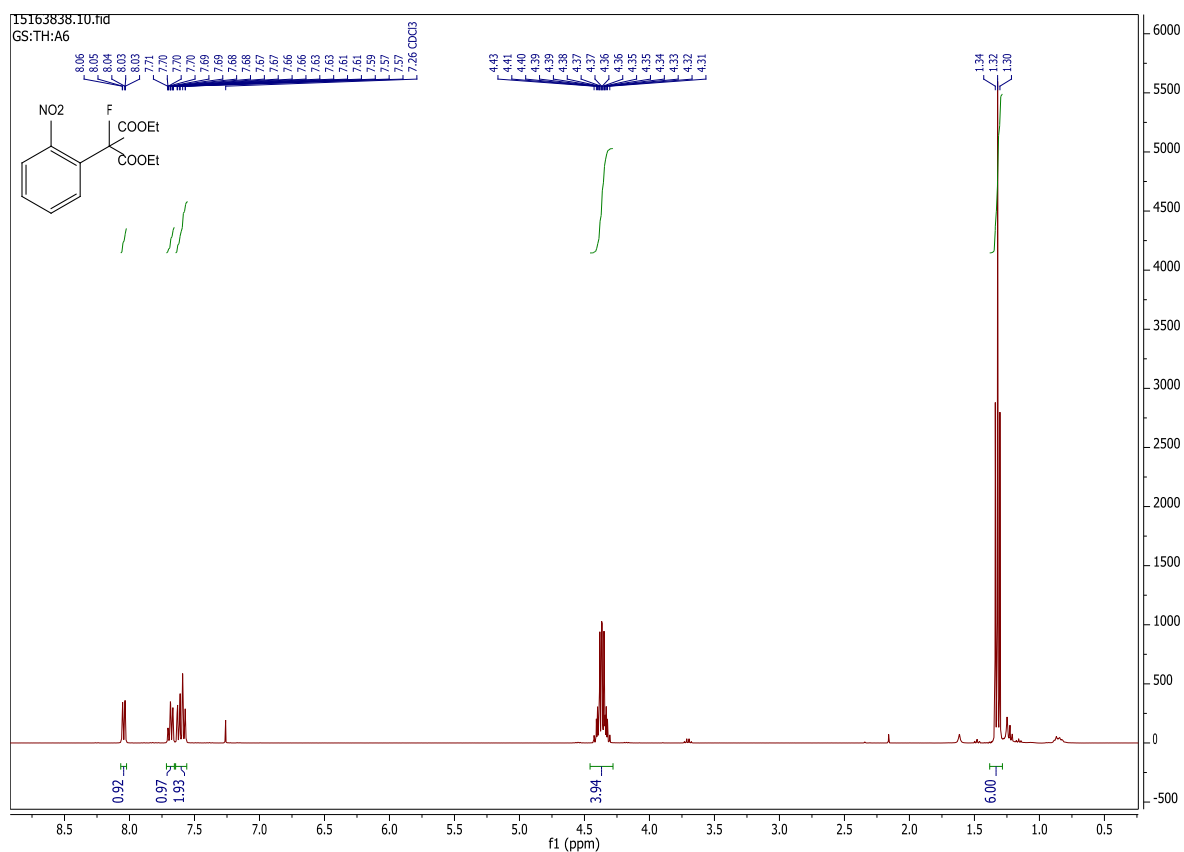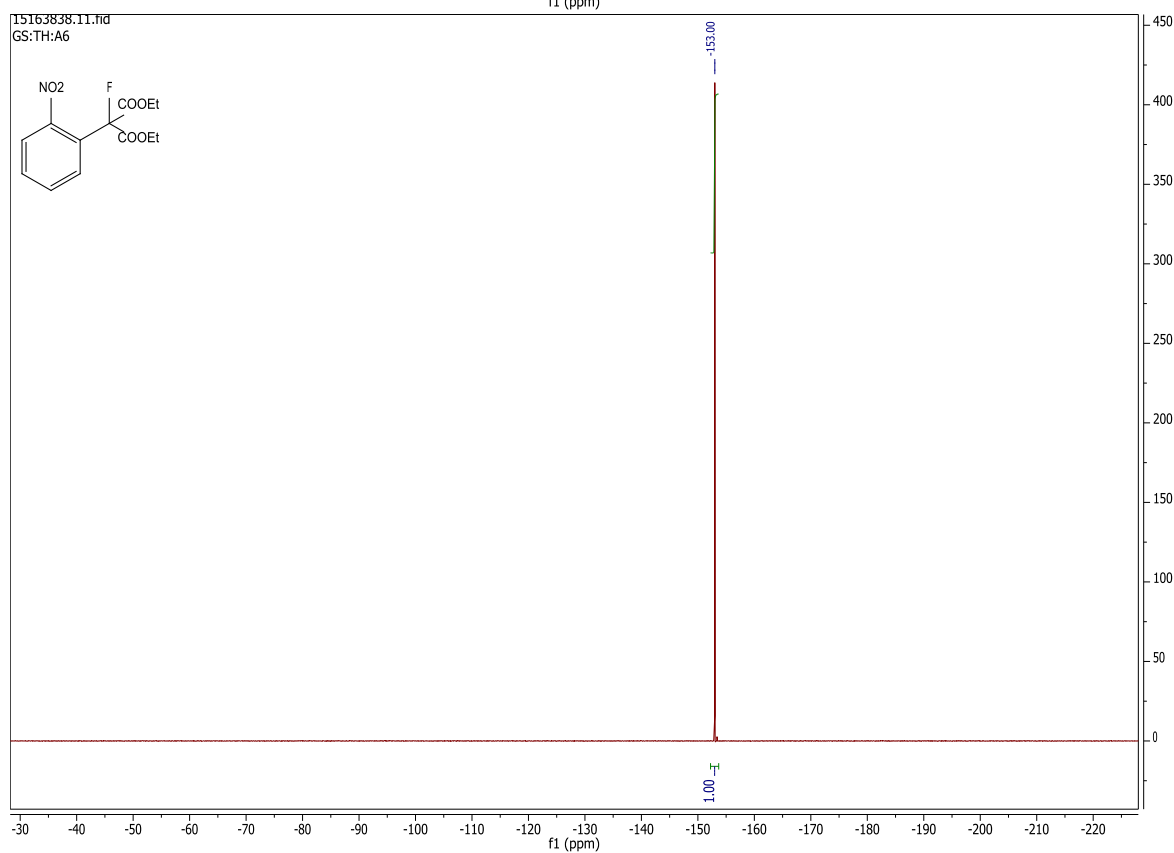

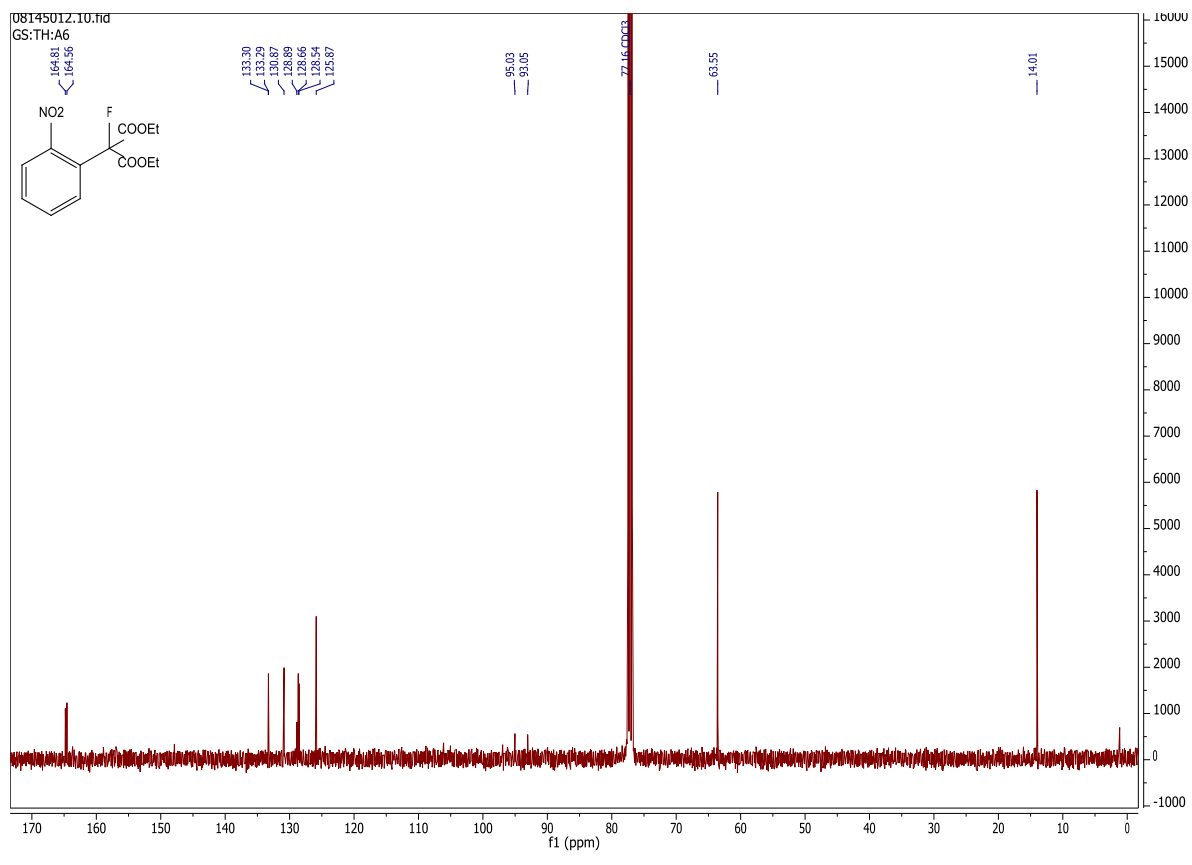

# 2-Fluoro-2-(2-nitrophenyl)acetic acid (**4a**)

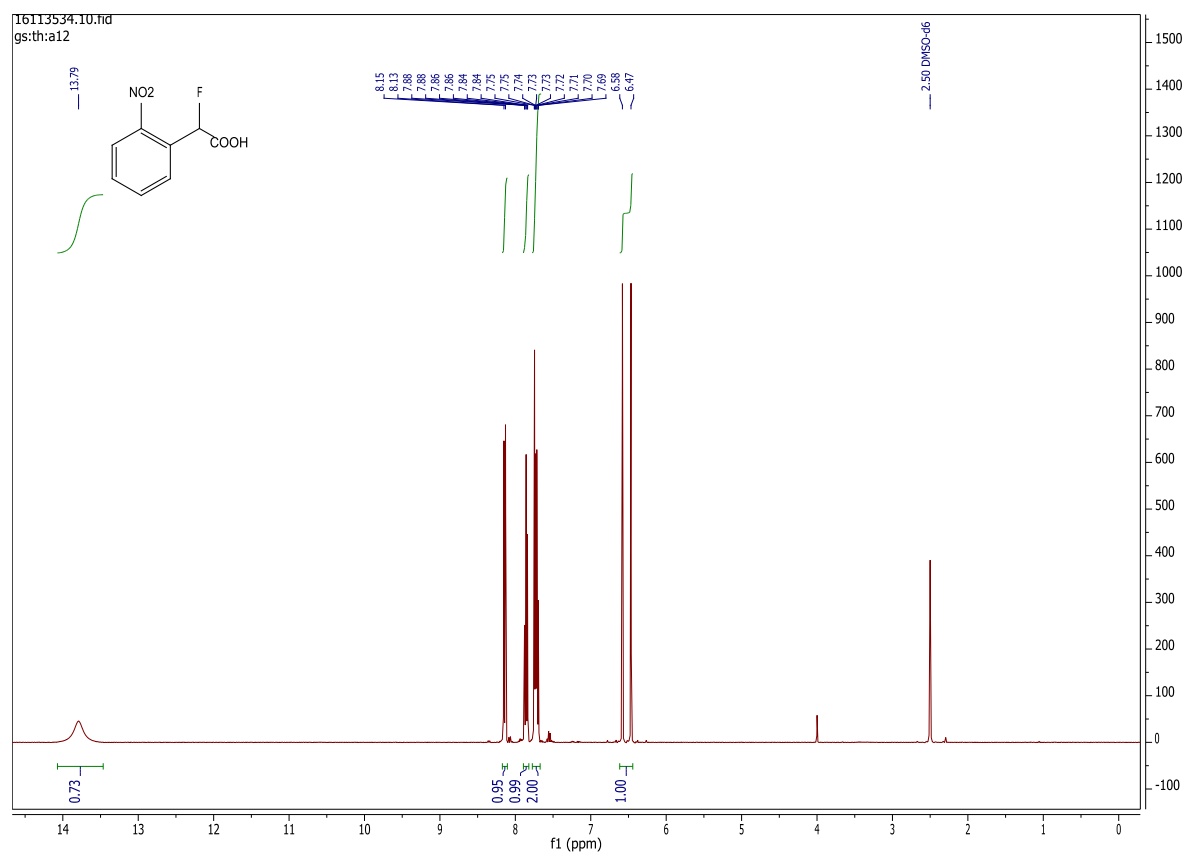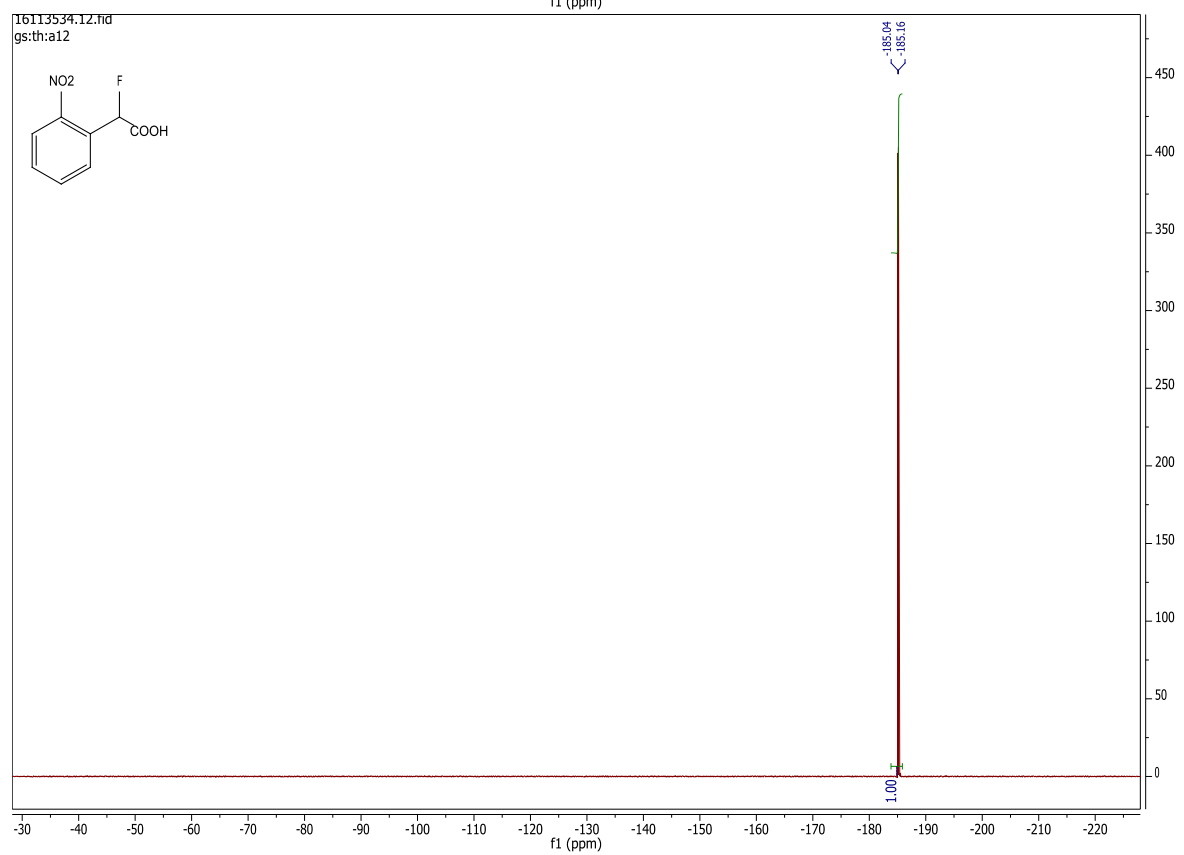

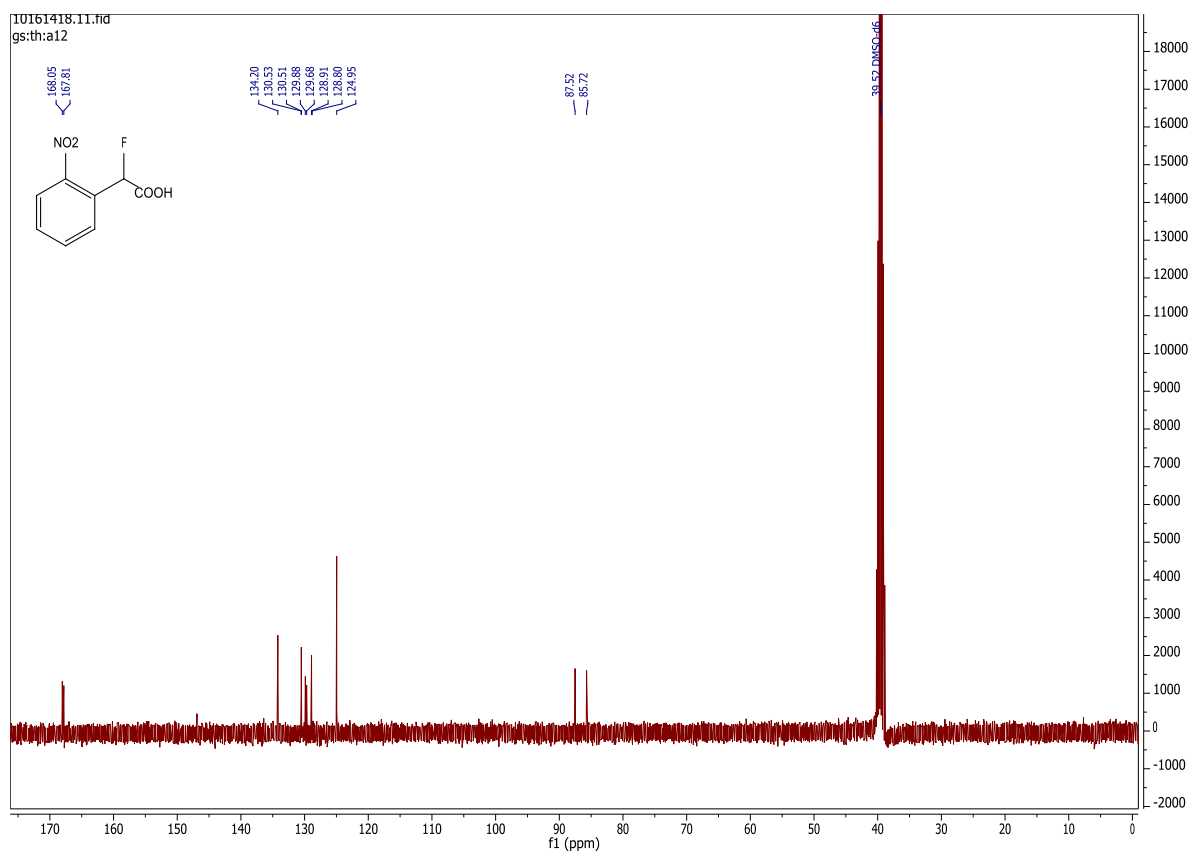

# 2-Fluoro-2-(2-nitro-4-(trifluoromethyl)phenyl)acetic acid (**4b**)

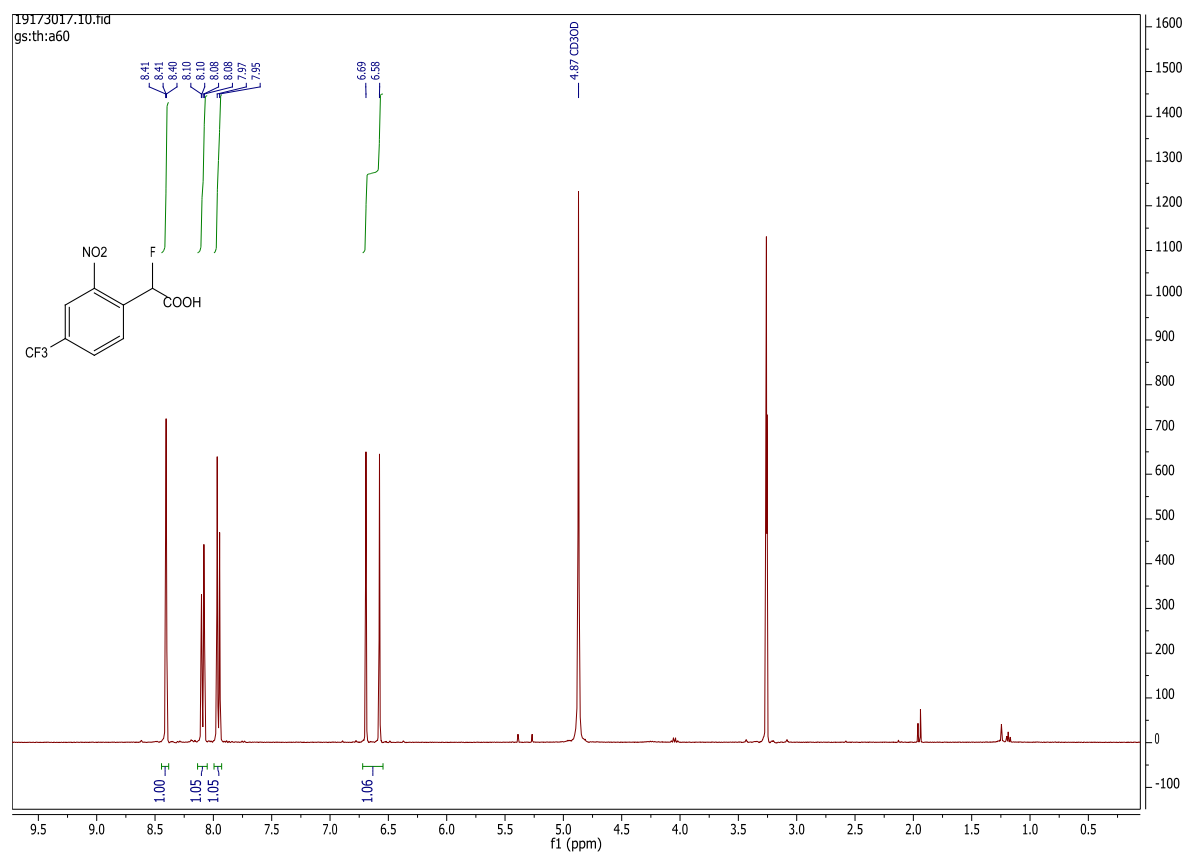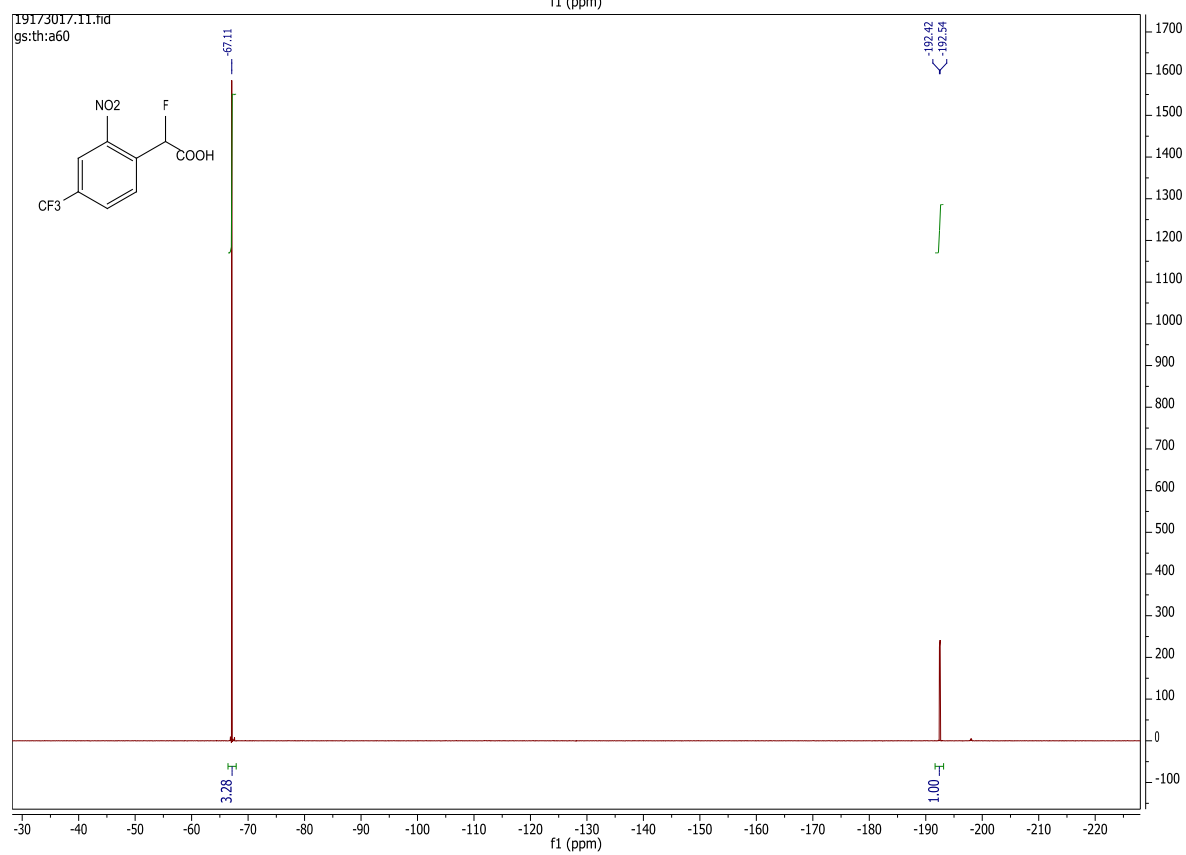

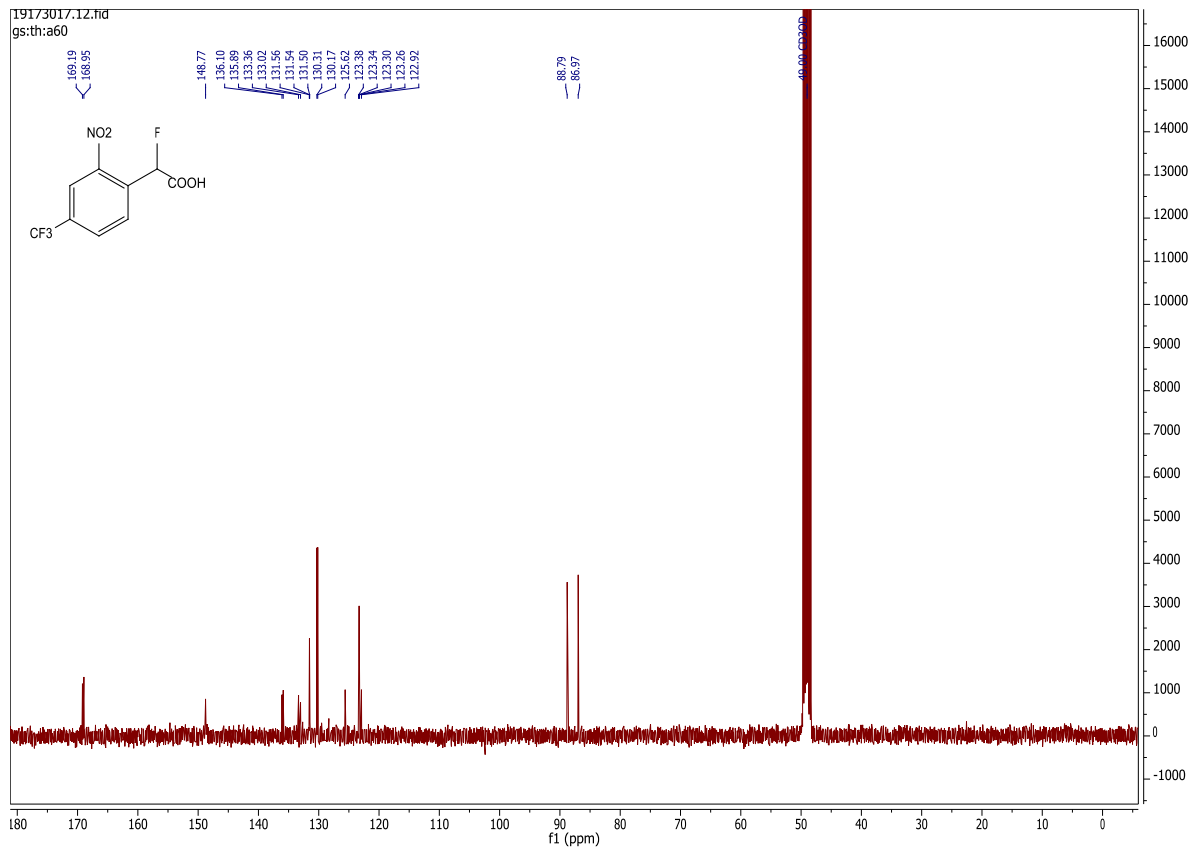



# 2-Fluoro-2-(2-nitro-4-bromophenyl)acetic acid (**4c**)

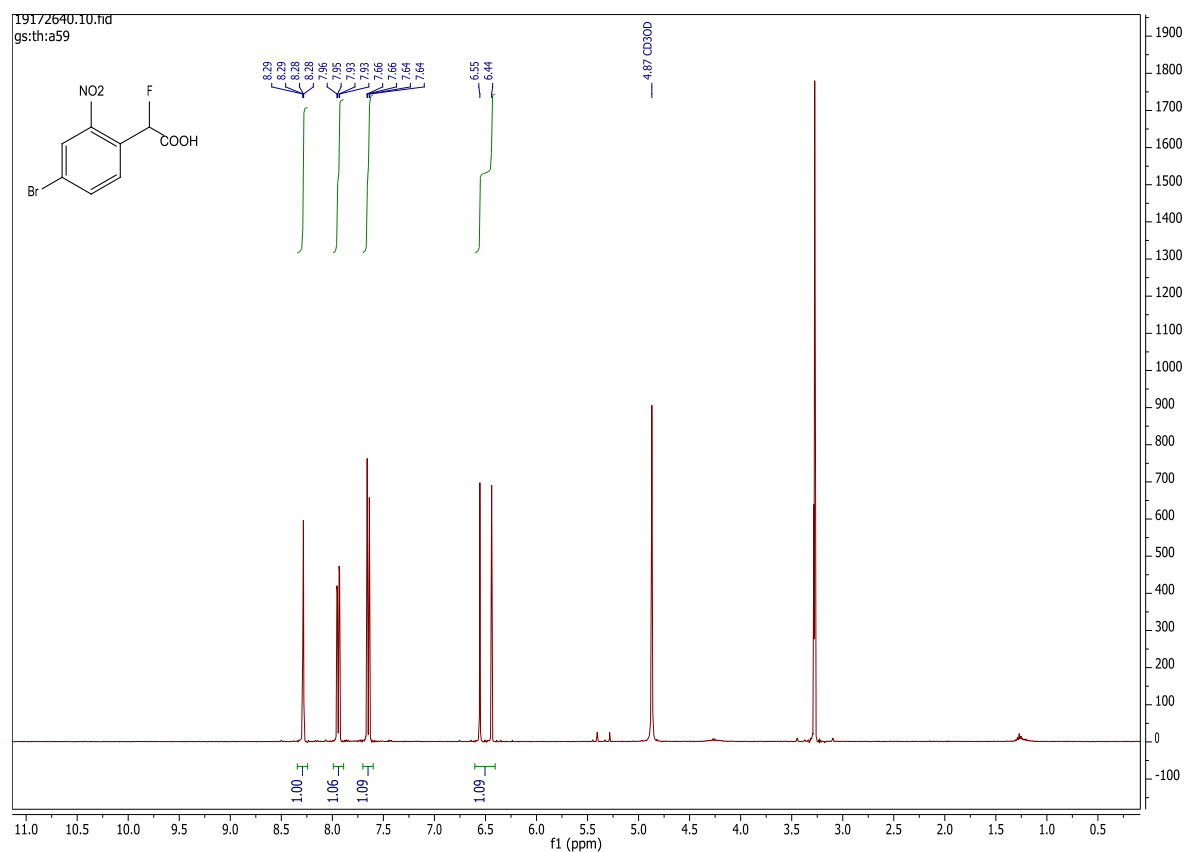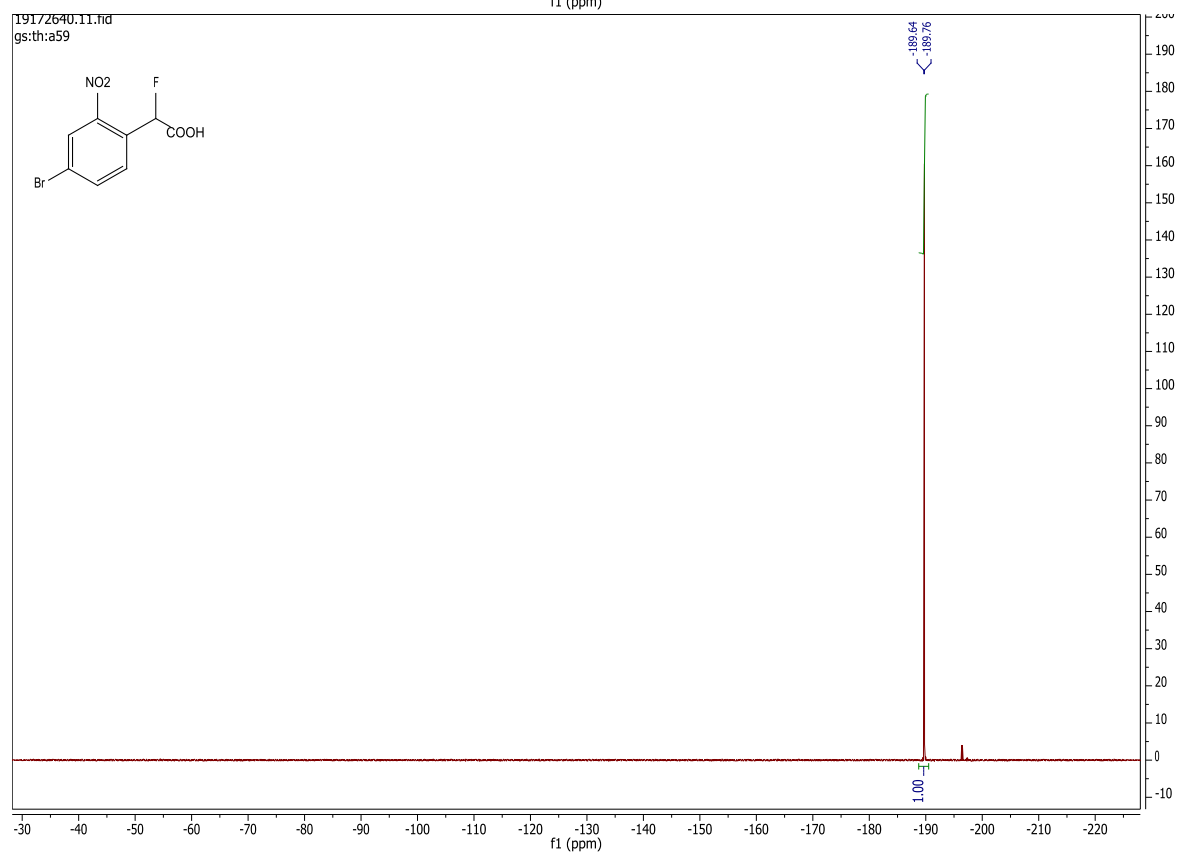

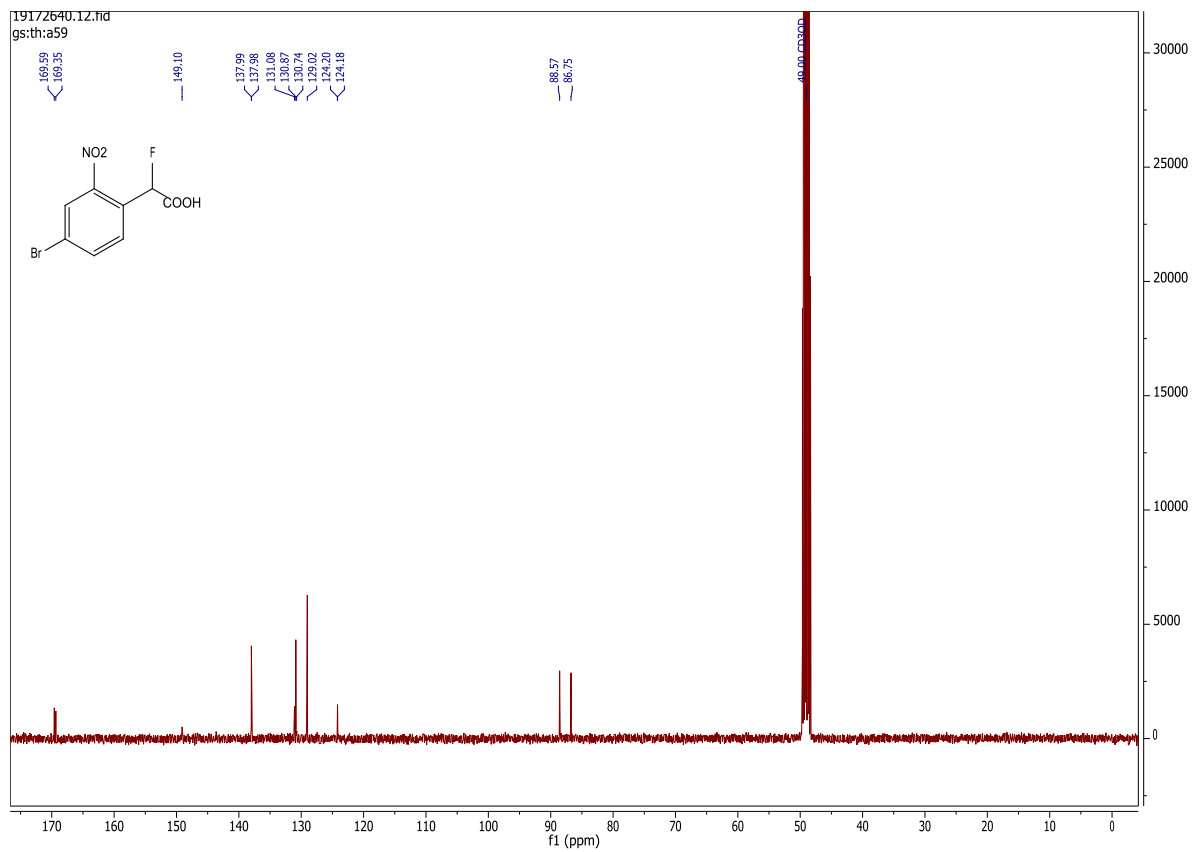

# 2-Fluoro-2-(2,4-dinitrophenyl)acetic acid (**4d**)

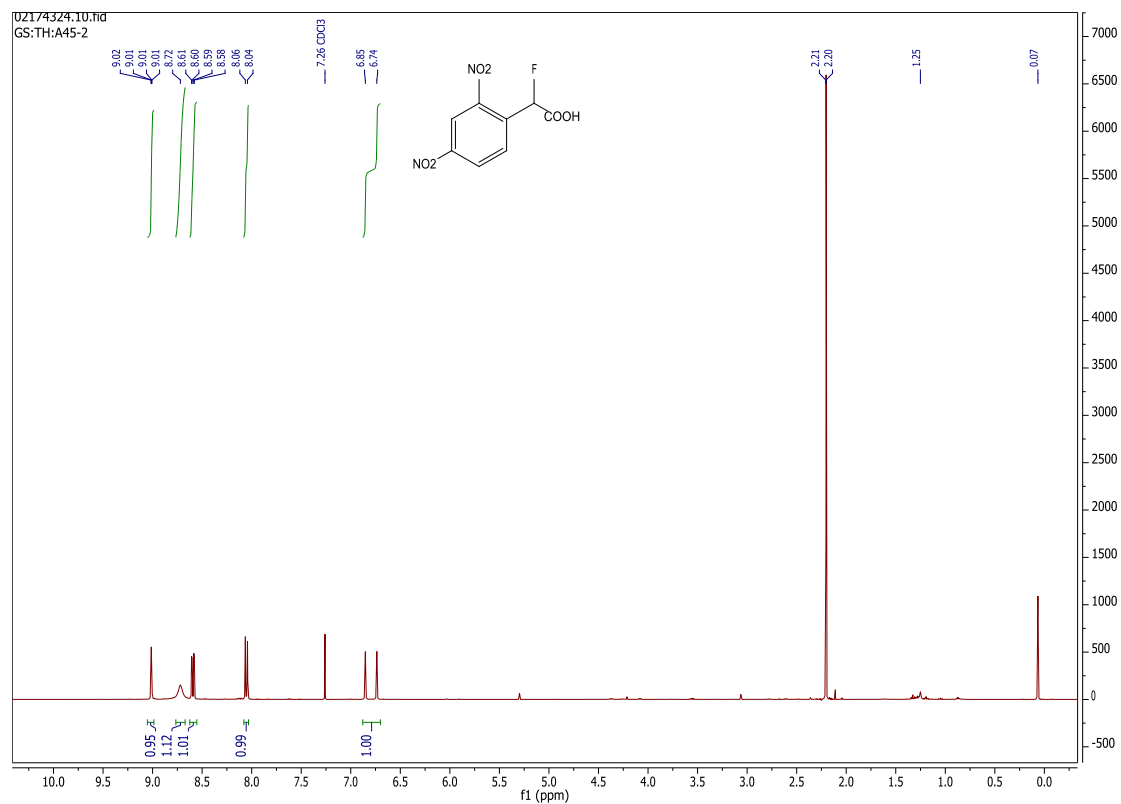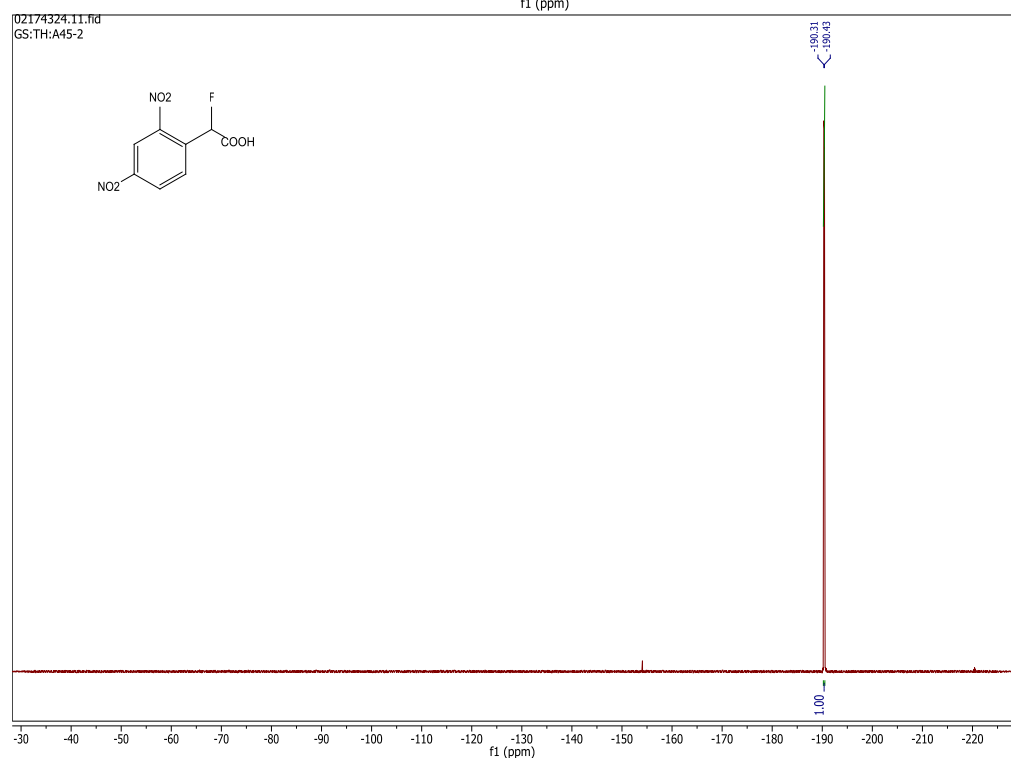

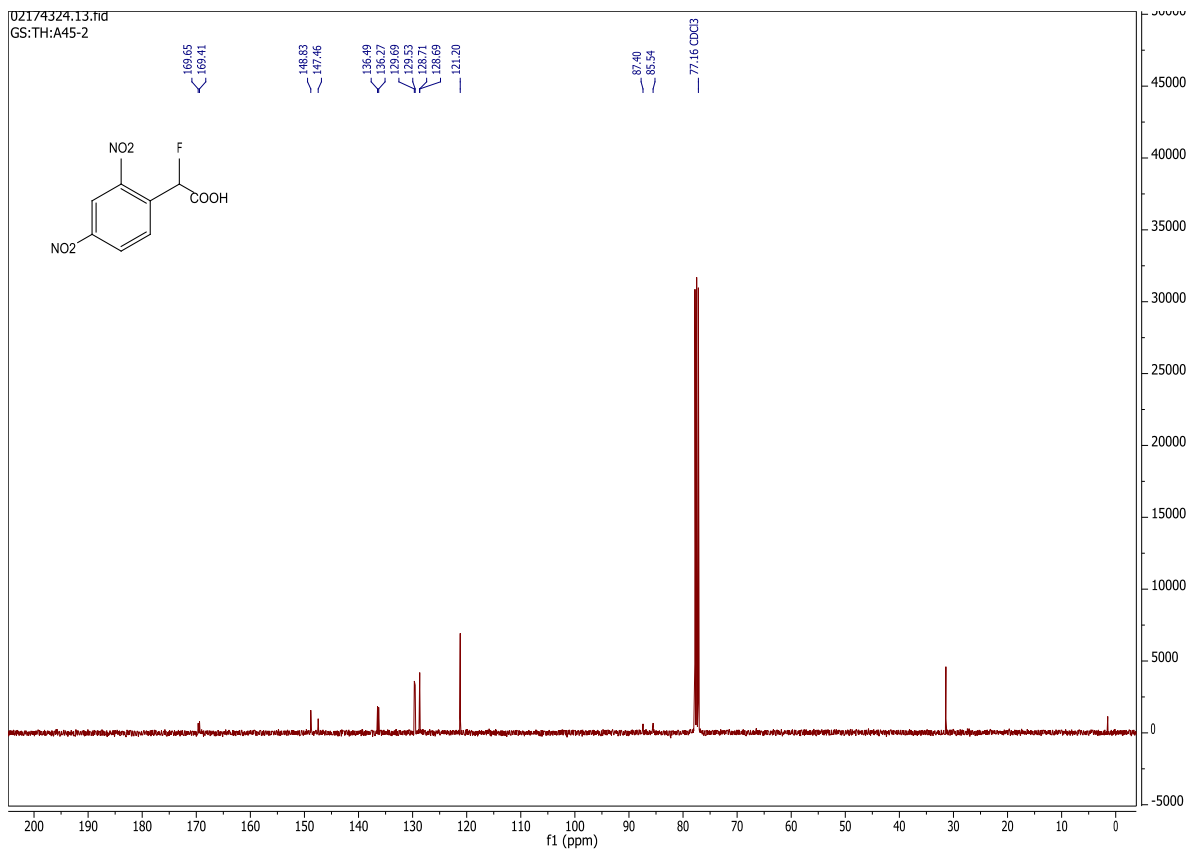

# 2-Fluoro-2-(2-nitro-5-methoxyphenyl)acetic acid (**4e**)

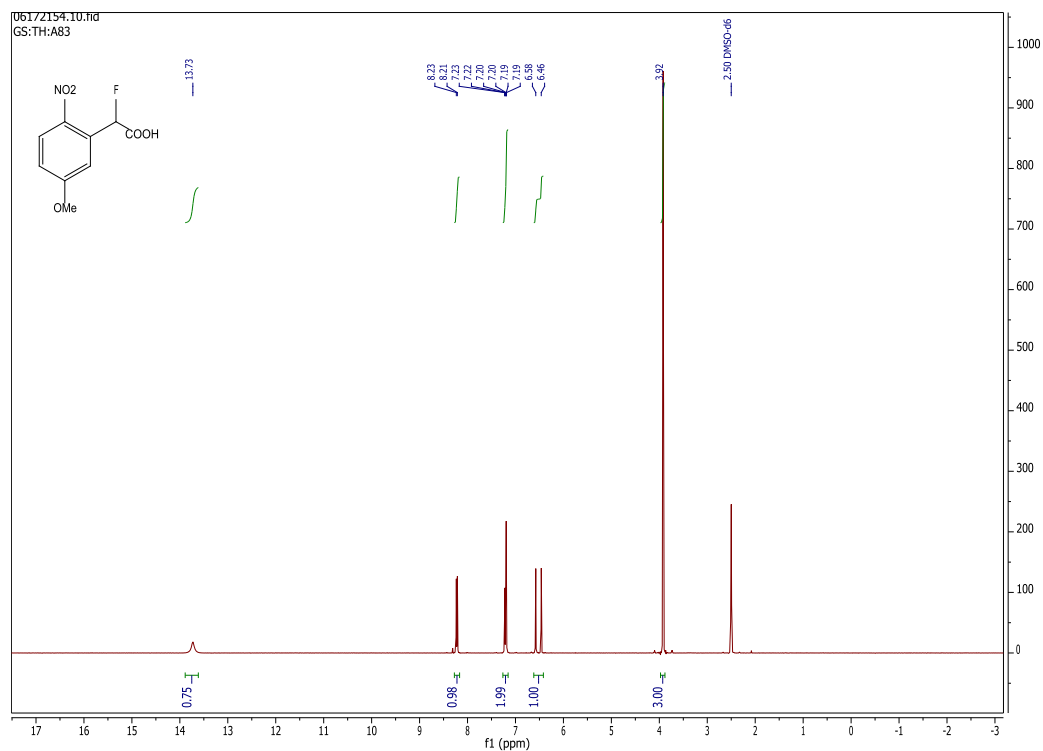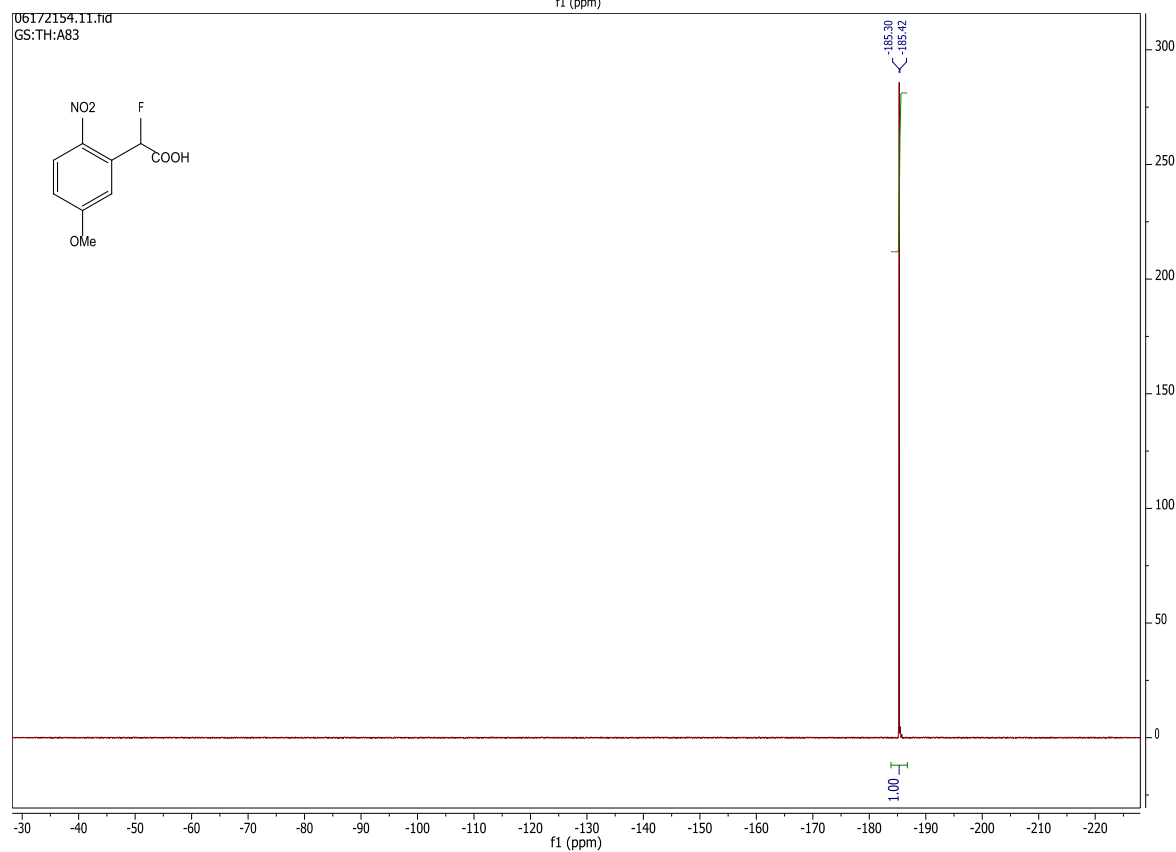

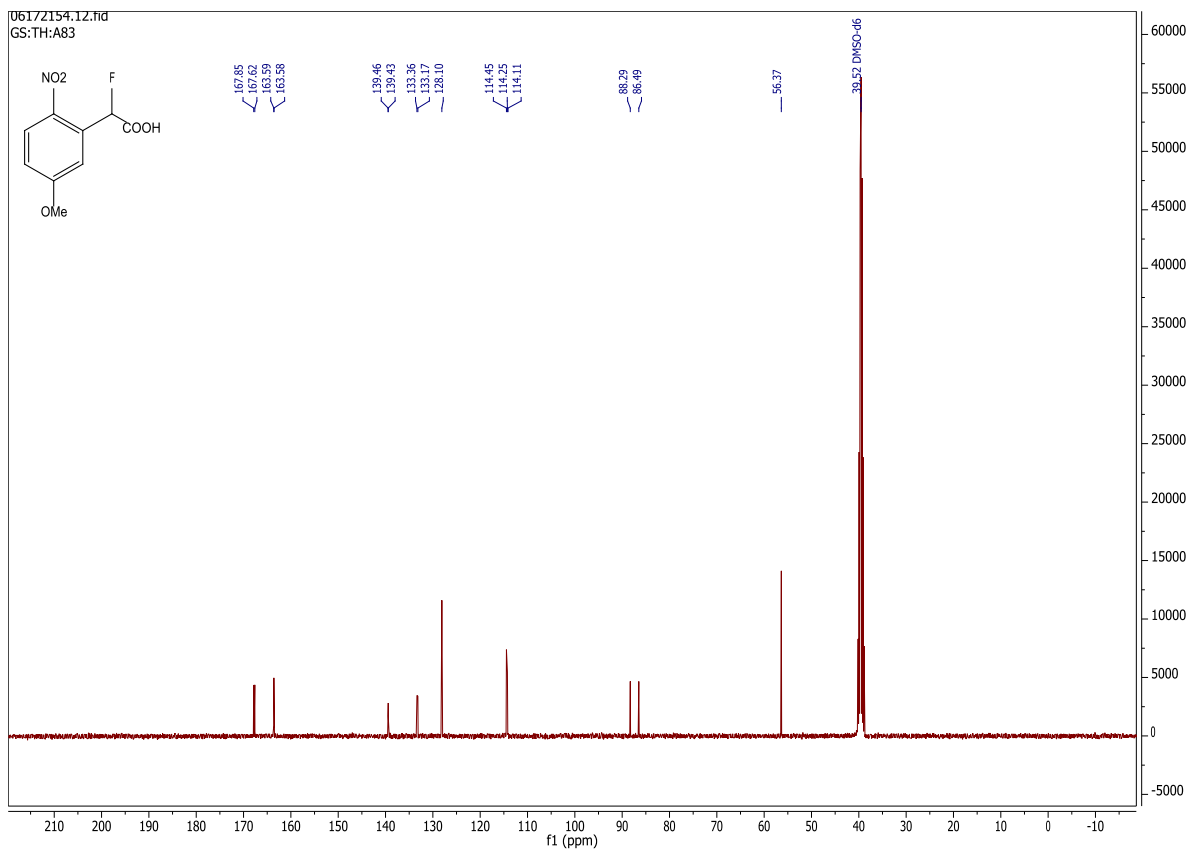

Potassium 2-fluoro-2-(3-nitro-2-pyridinyl)acetate (**4f**)

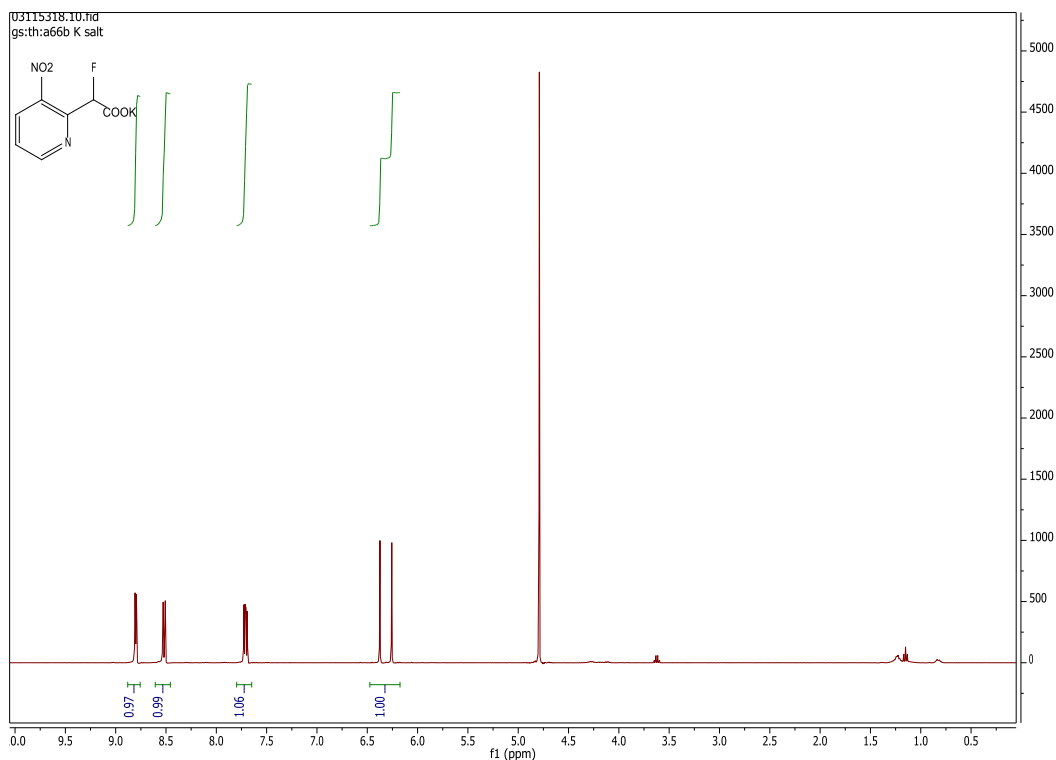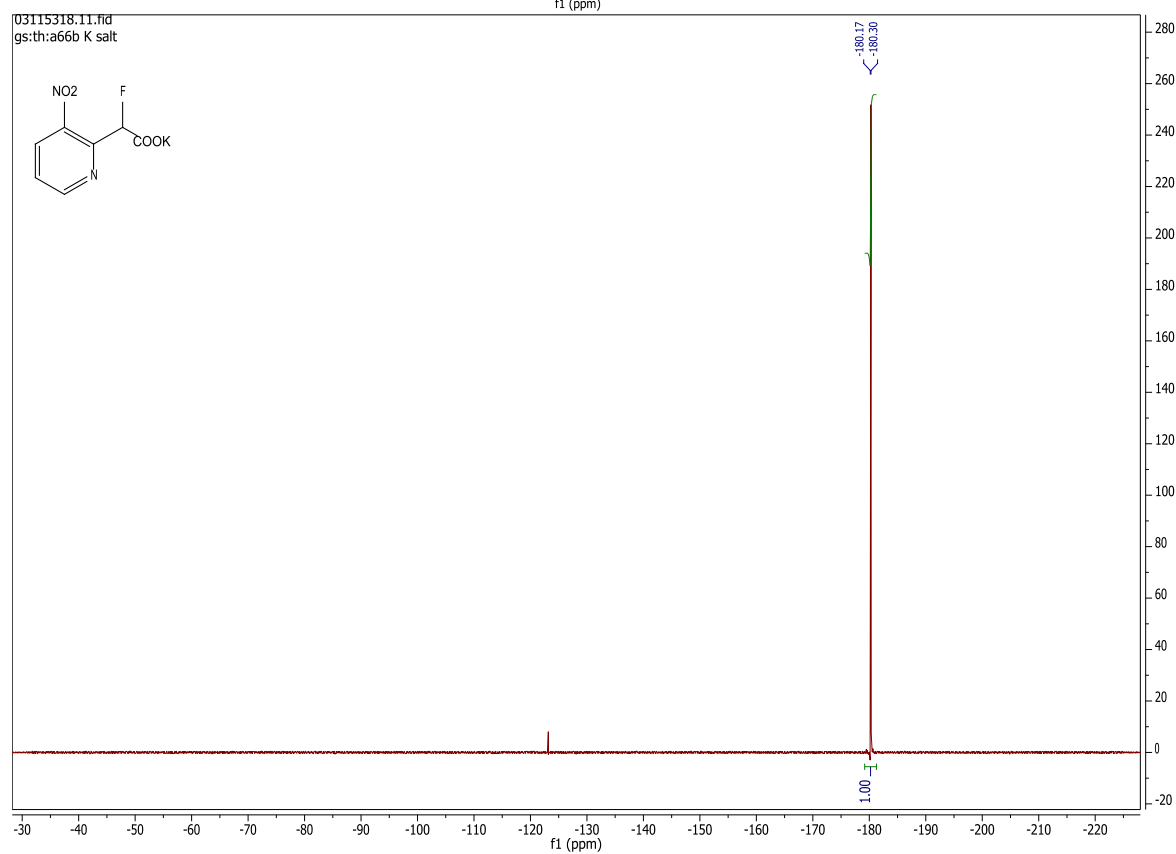

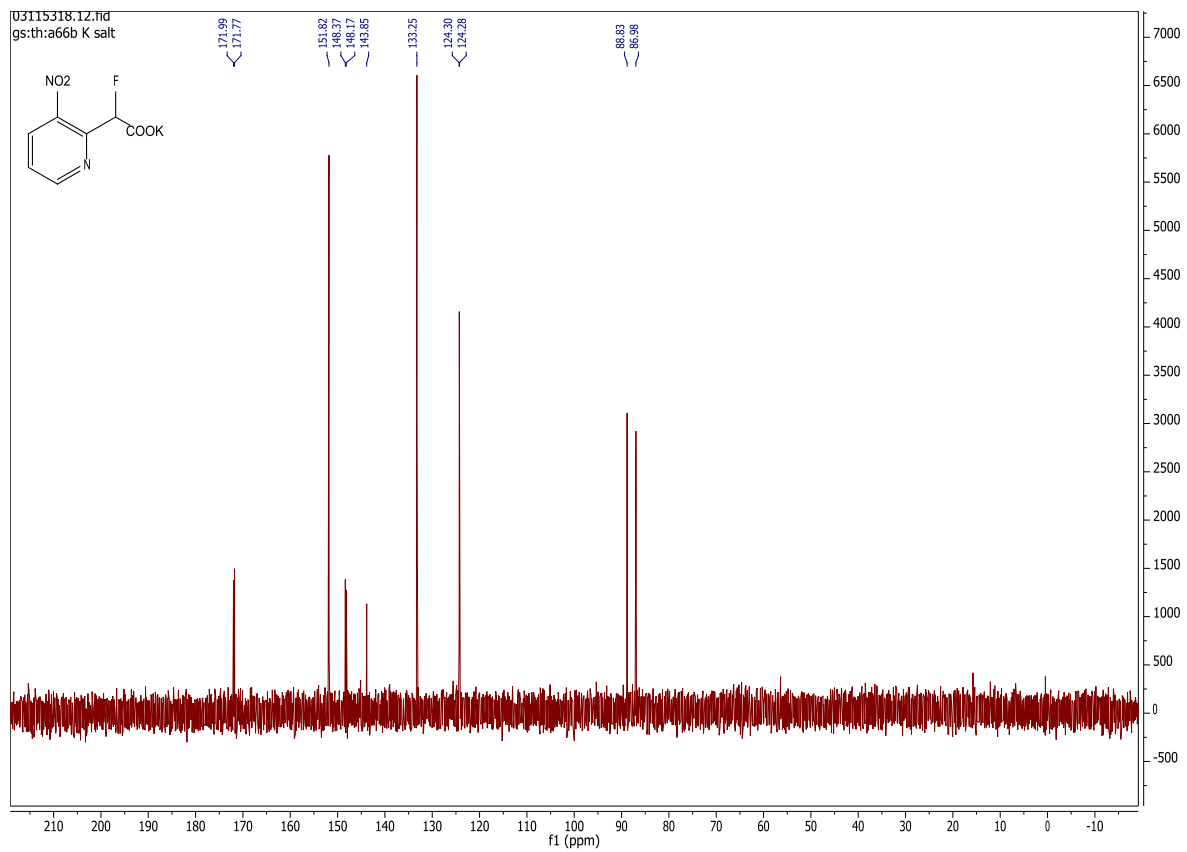



# Methyl 2-fluoro-2-(2-nitrophenyl)acetate (**6a**)

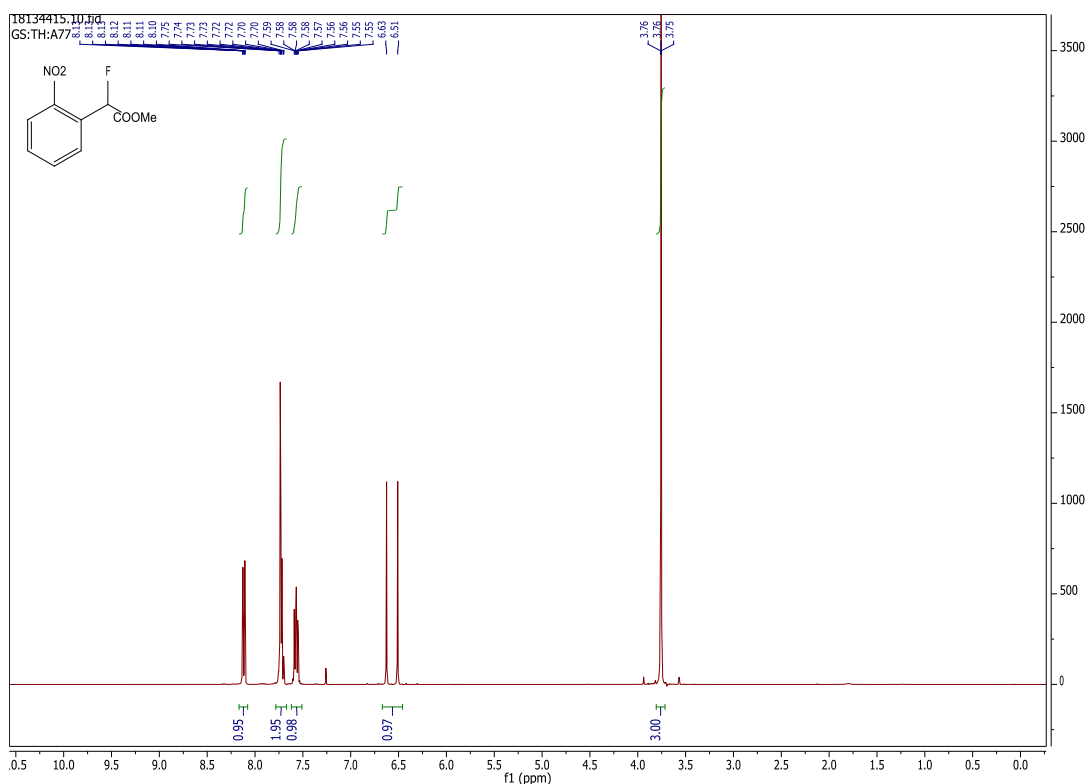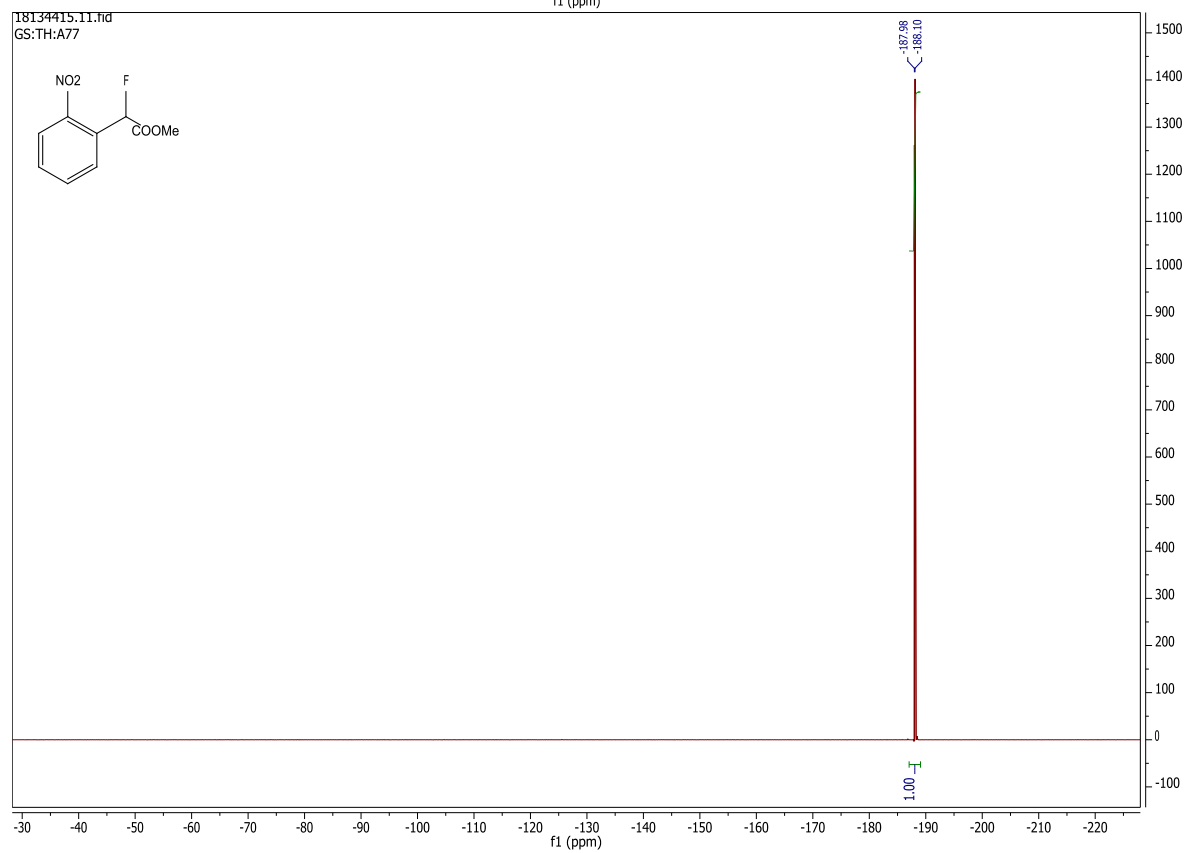

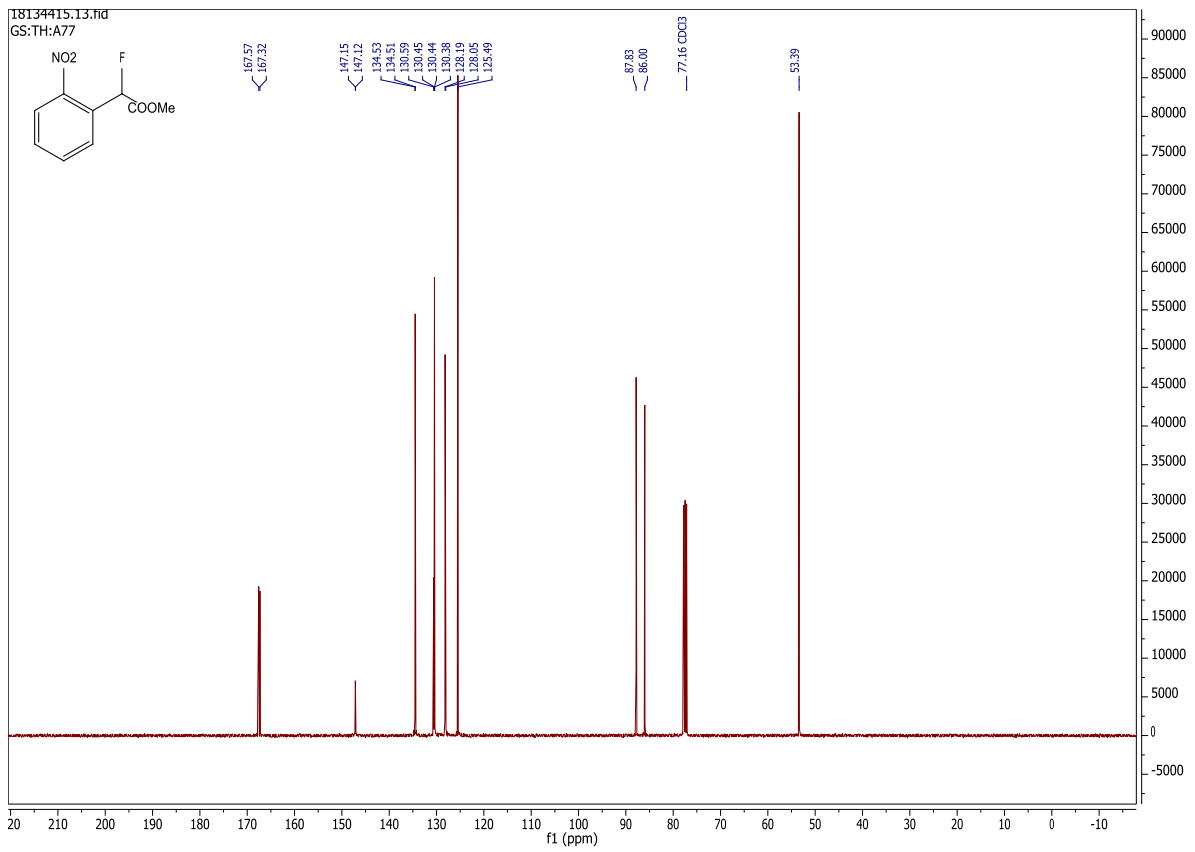

# Methyl 2-fluoro-2-(2-nitro-4-trifluoromethylphenyl)acetate (**6b**)

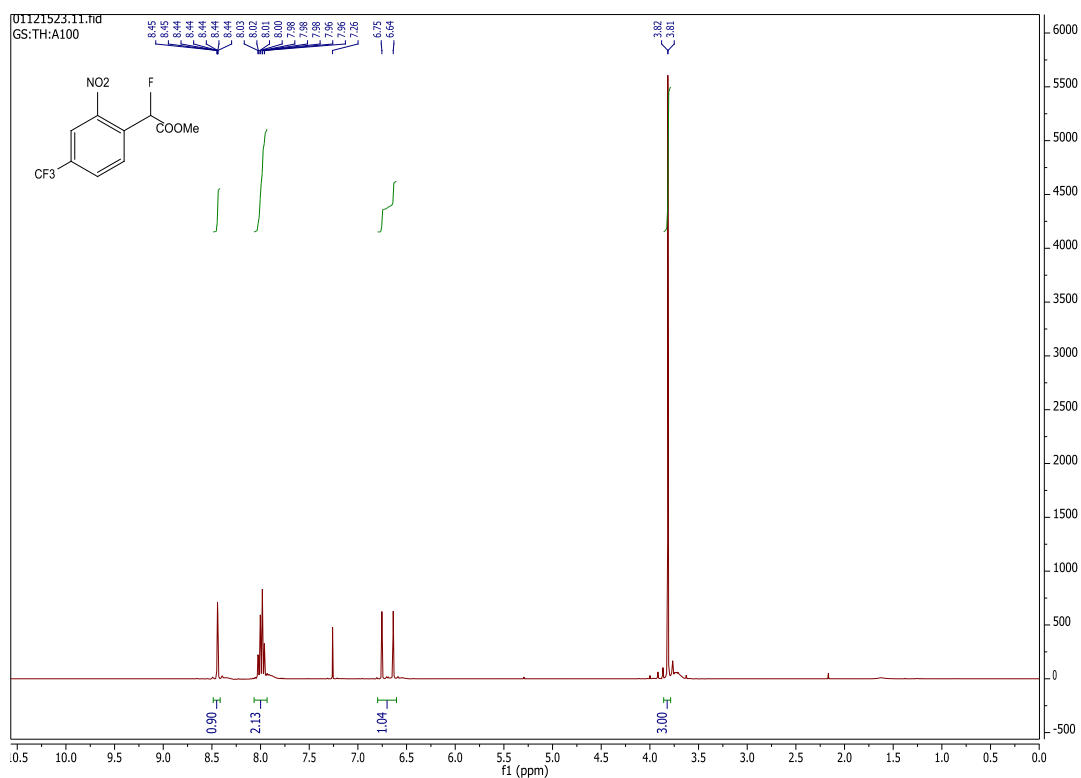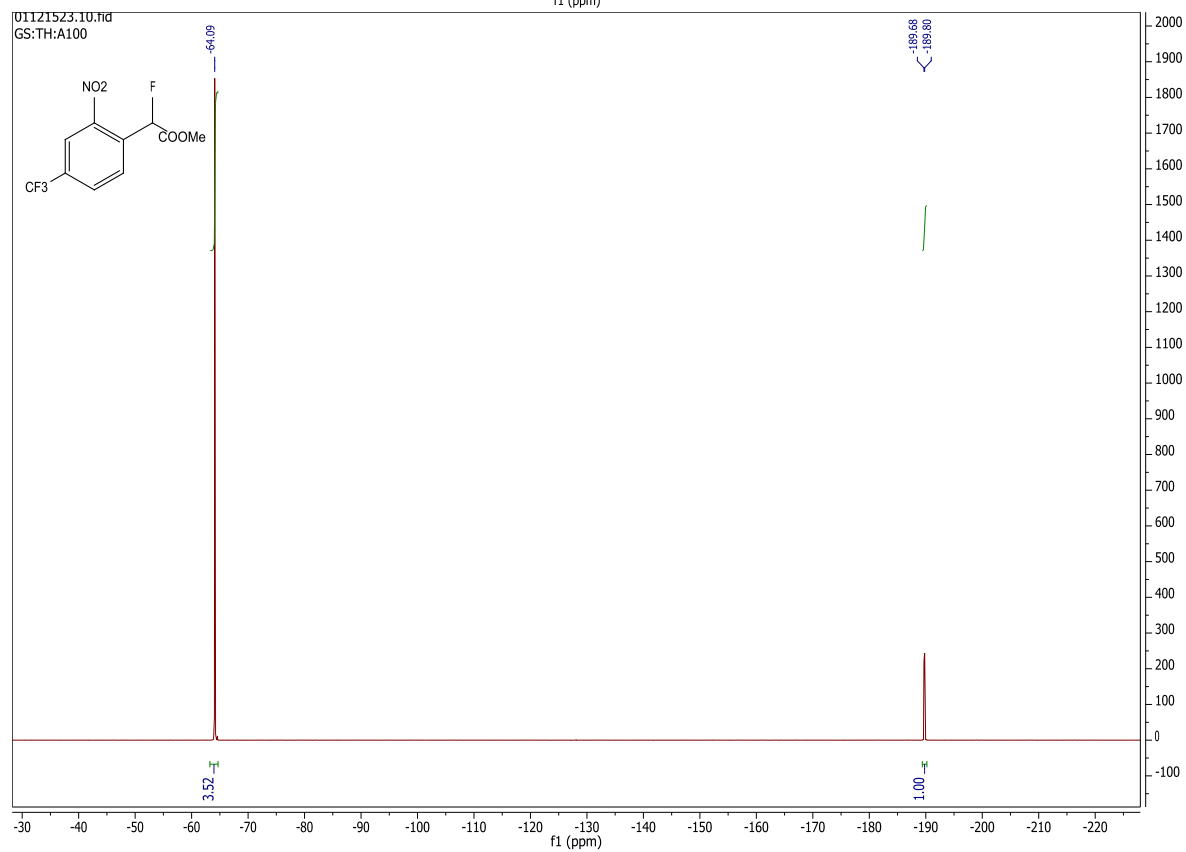

01121523.12.tif  
GS:TH:A100

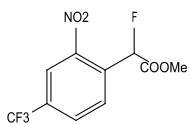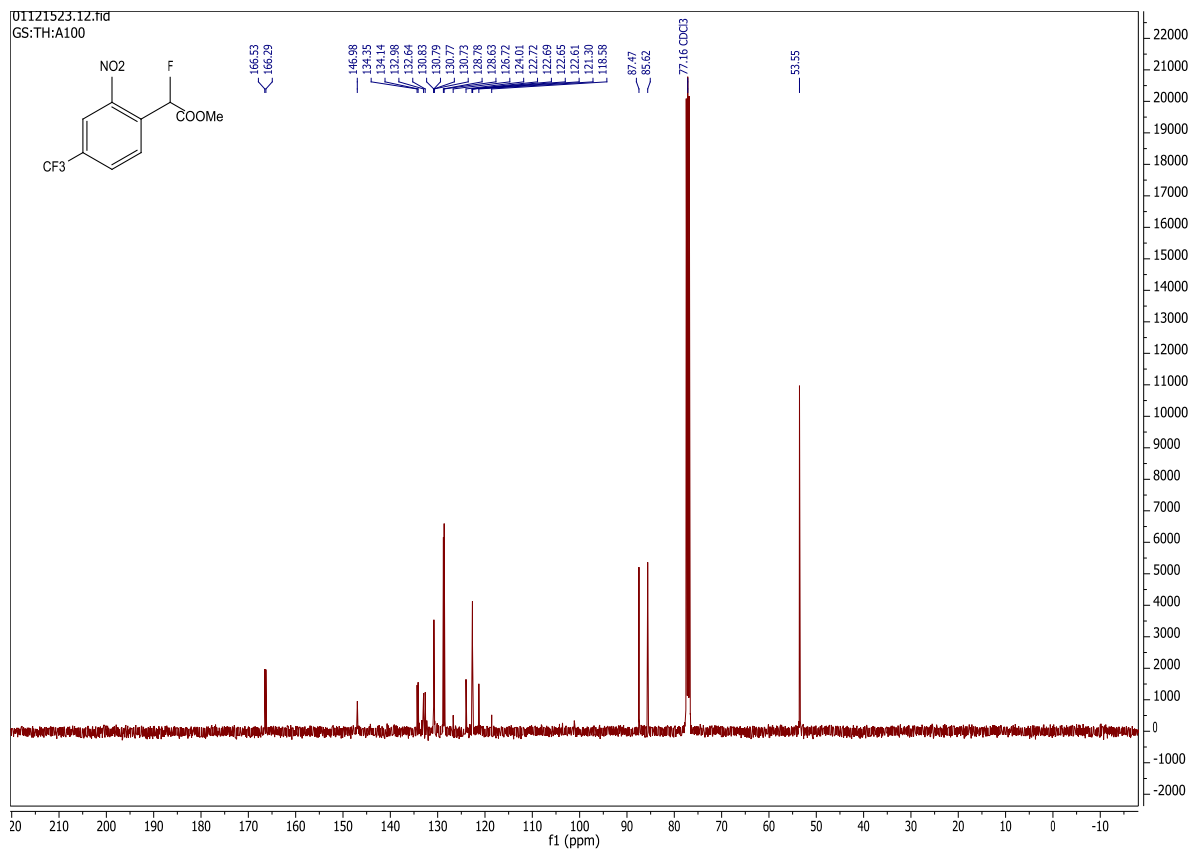

# Methyl 2-fluoro-2-(2-nitro-4-bromophenyl)acetate (**6c**)

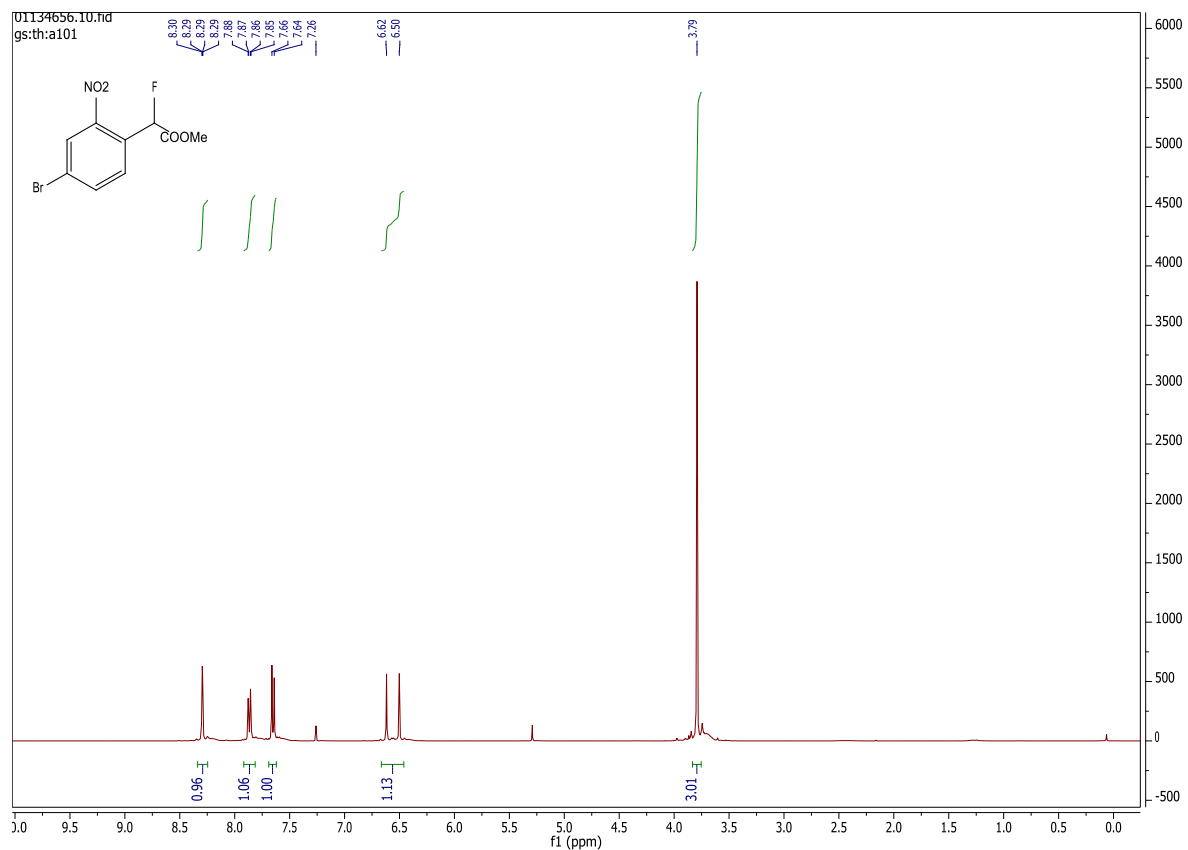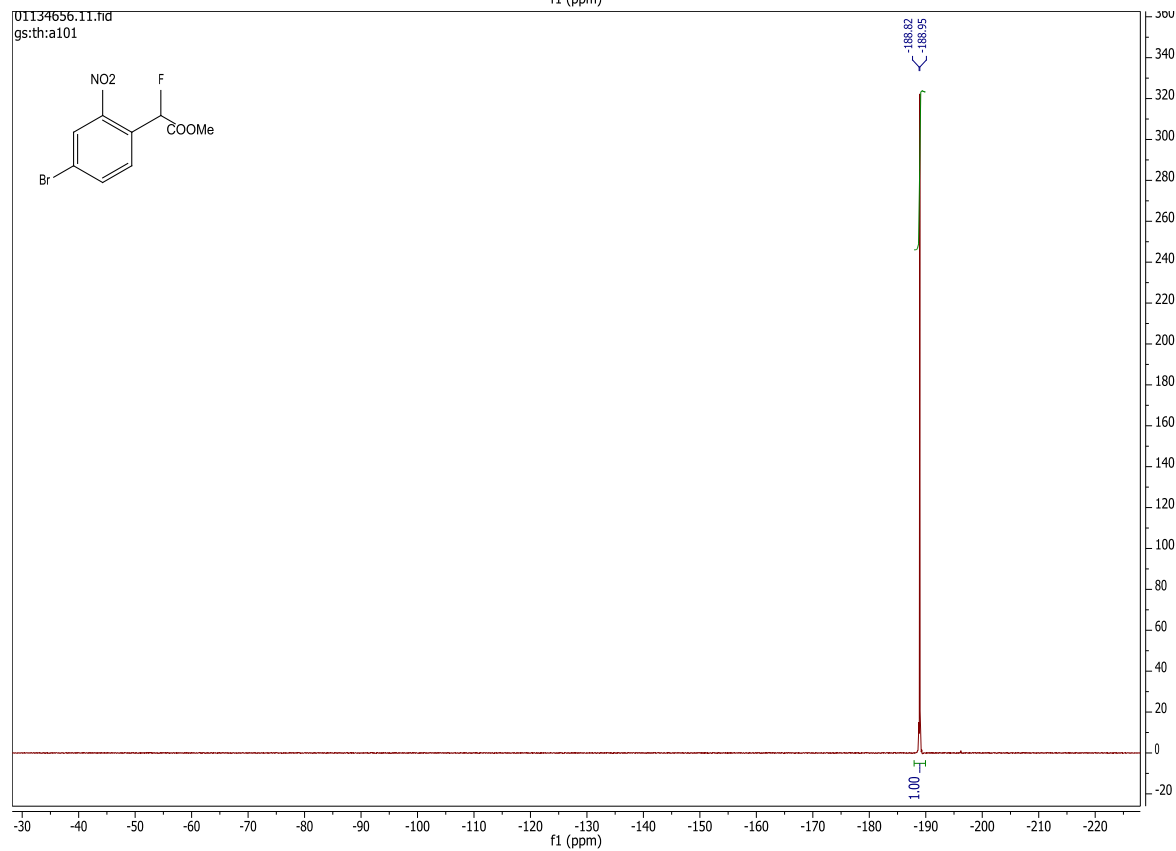

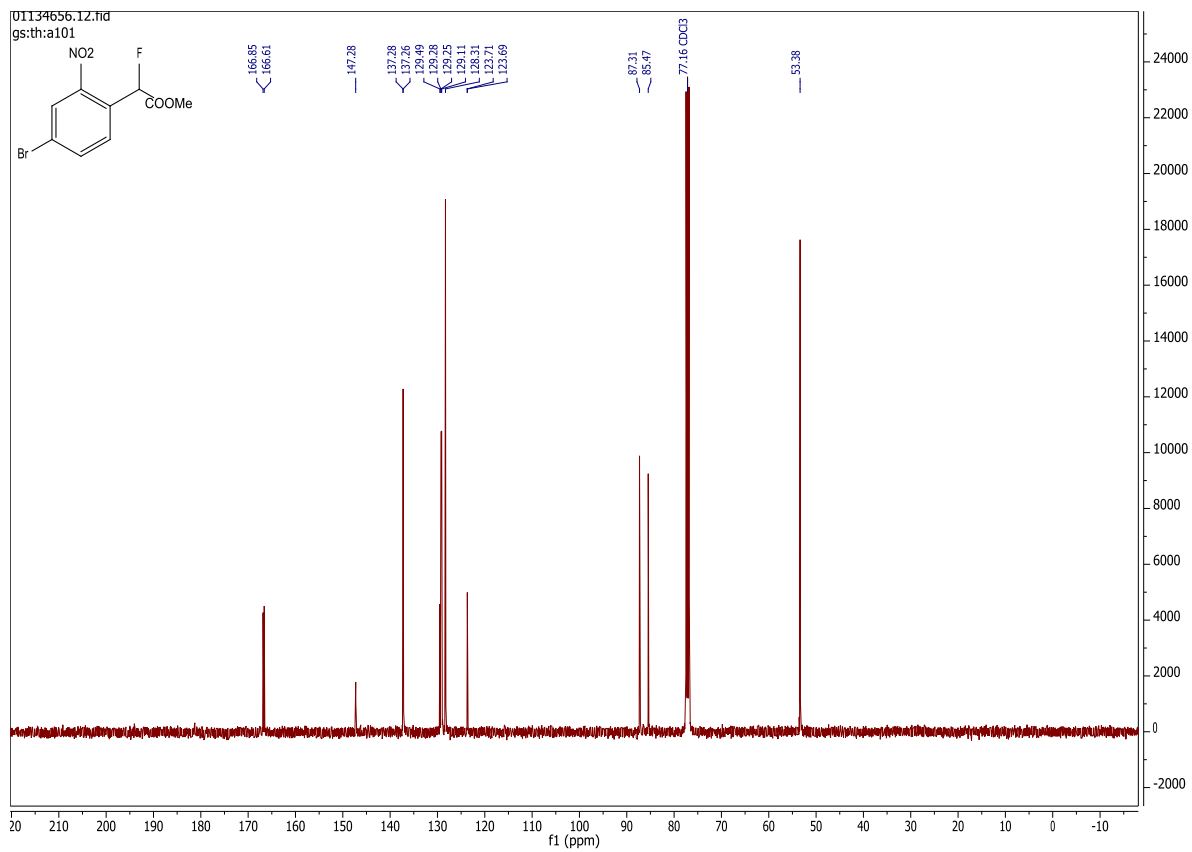

# Methyl 2-fluoro-2-(2,4-dinitrophenyl)acetate (**6d**)

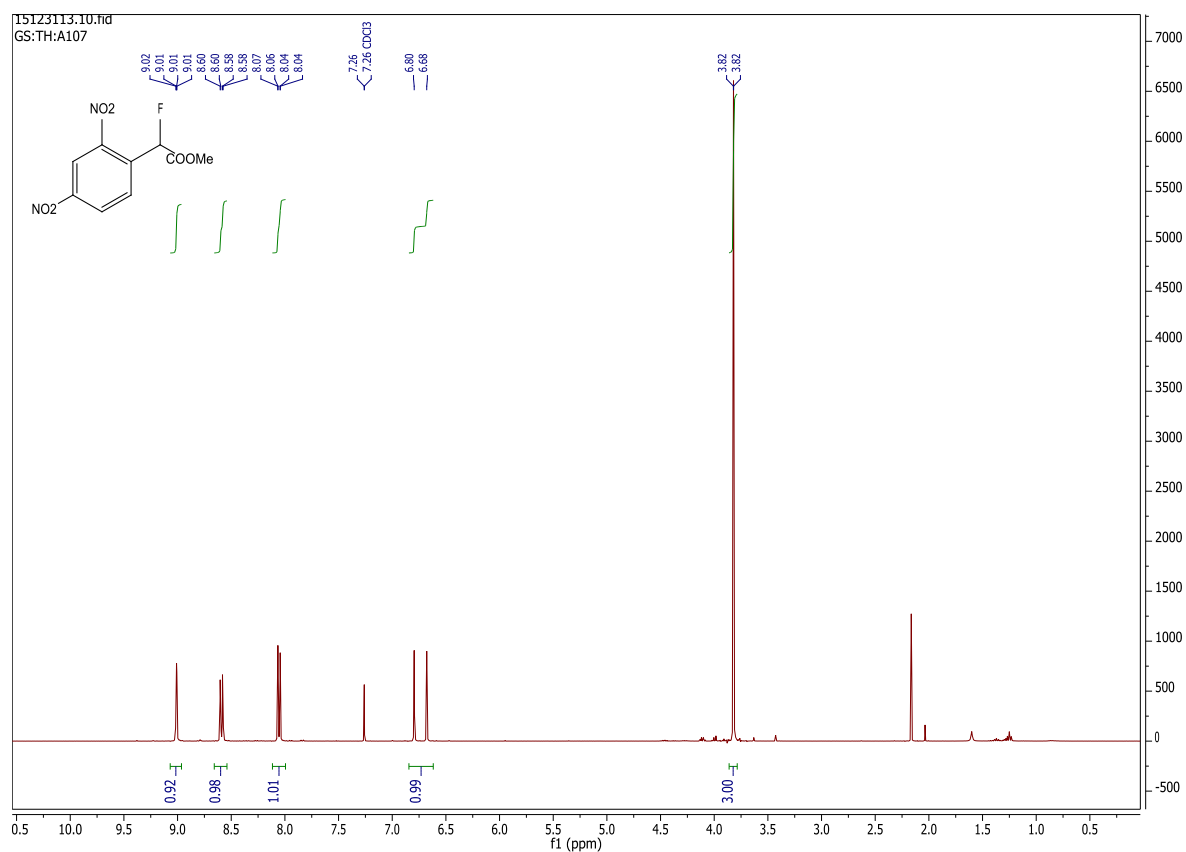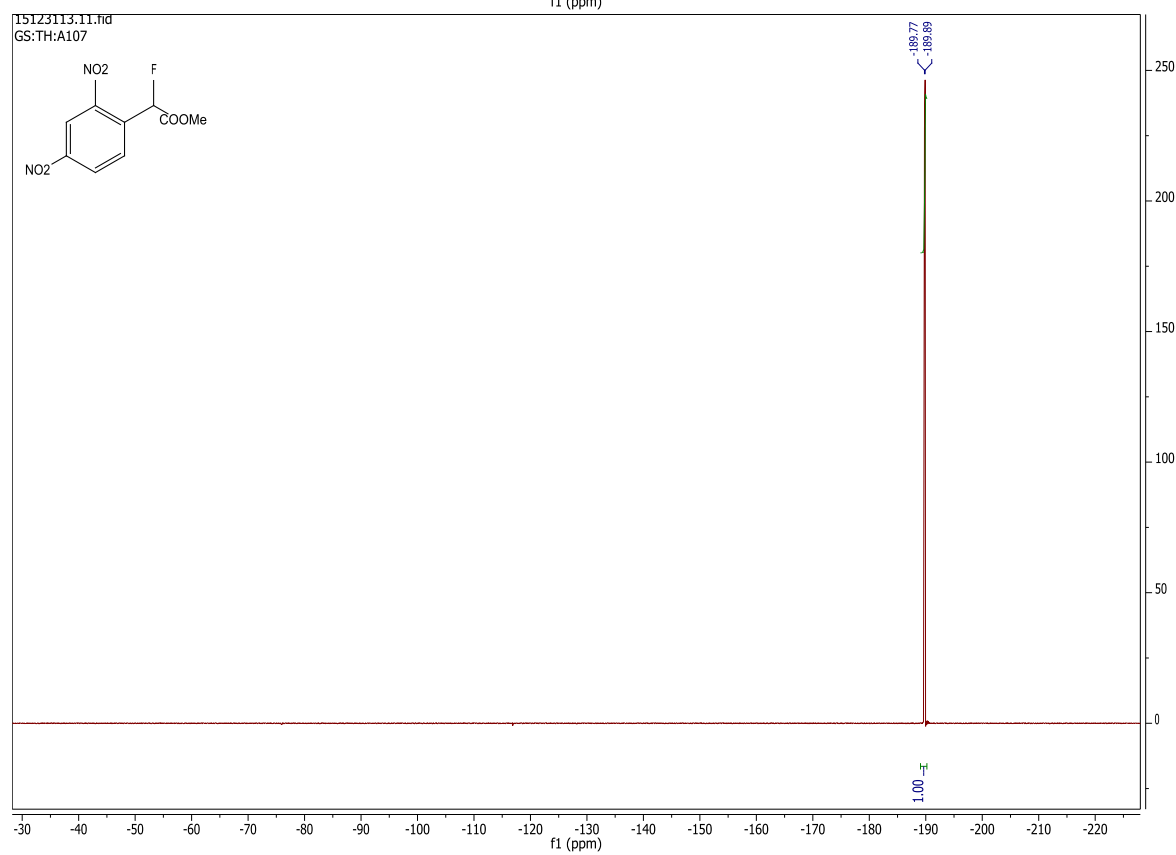

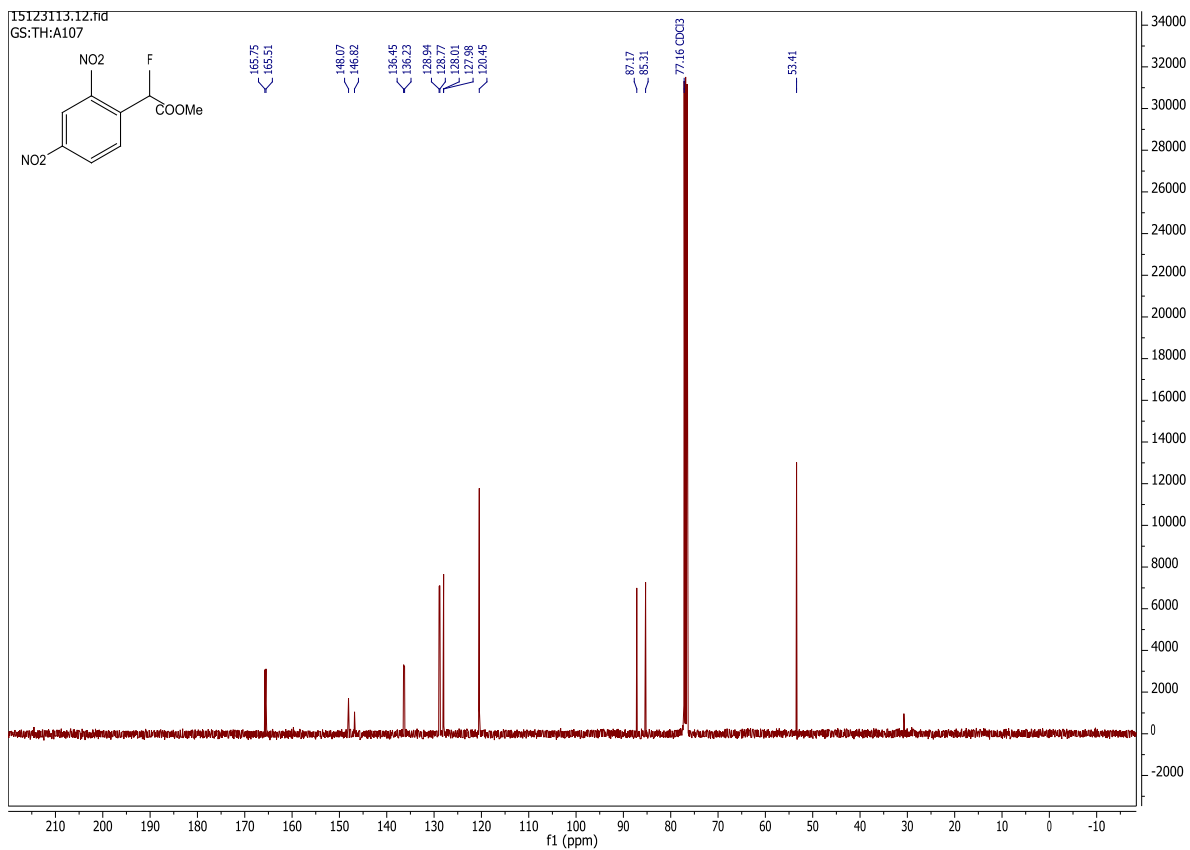



# Methyl 2-fluoro-2-(2-nitro-5-methoxyphenyl)acetate (**6e**)

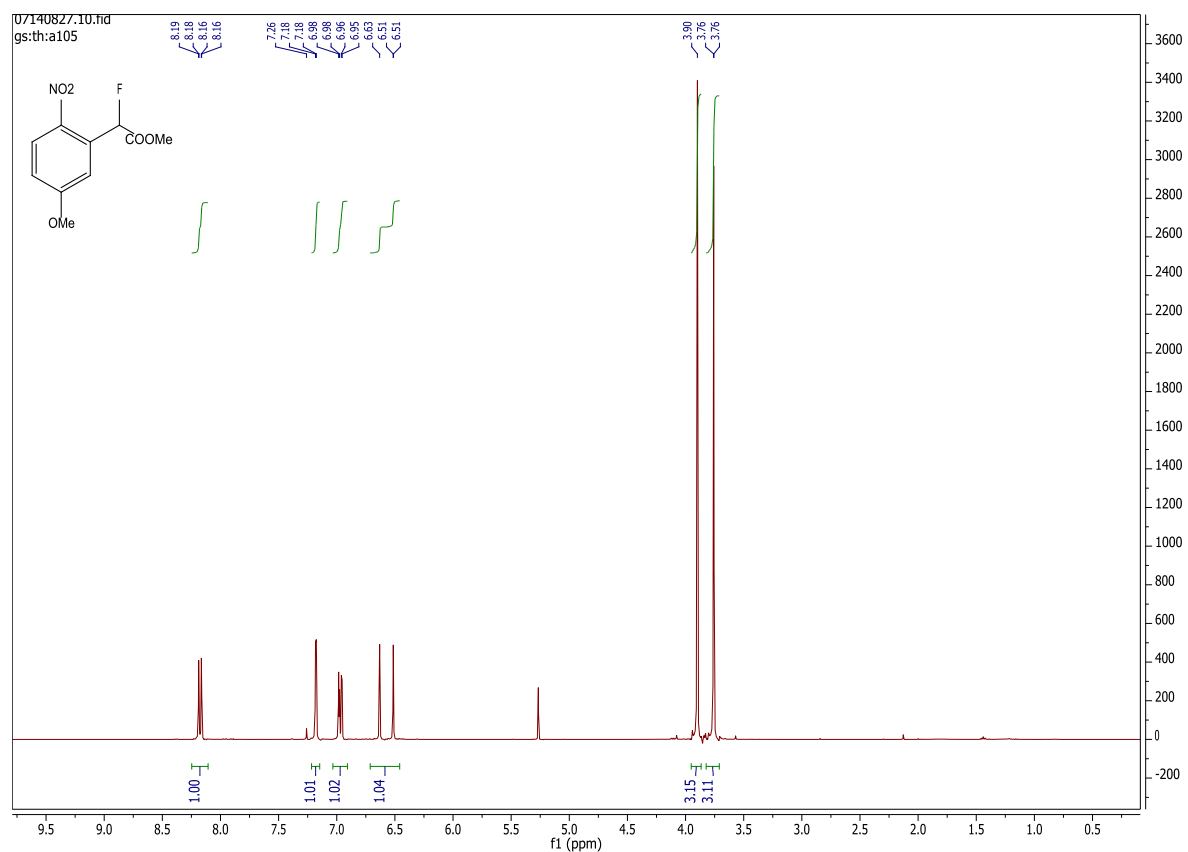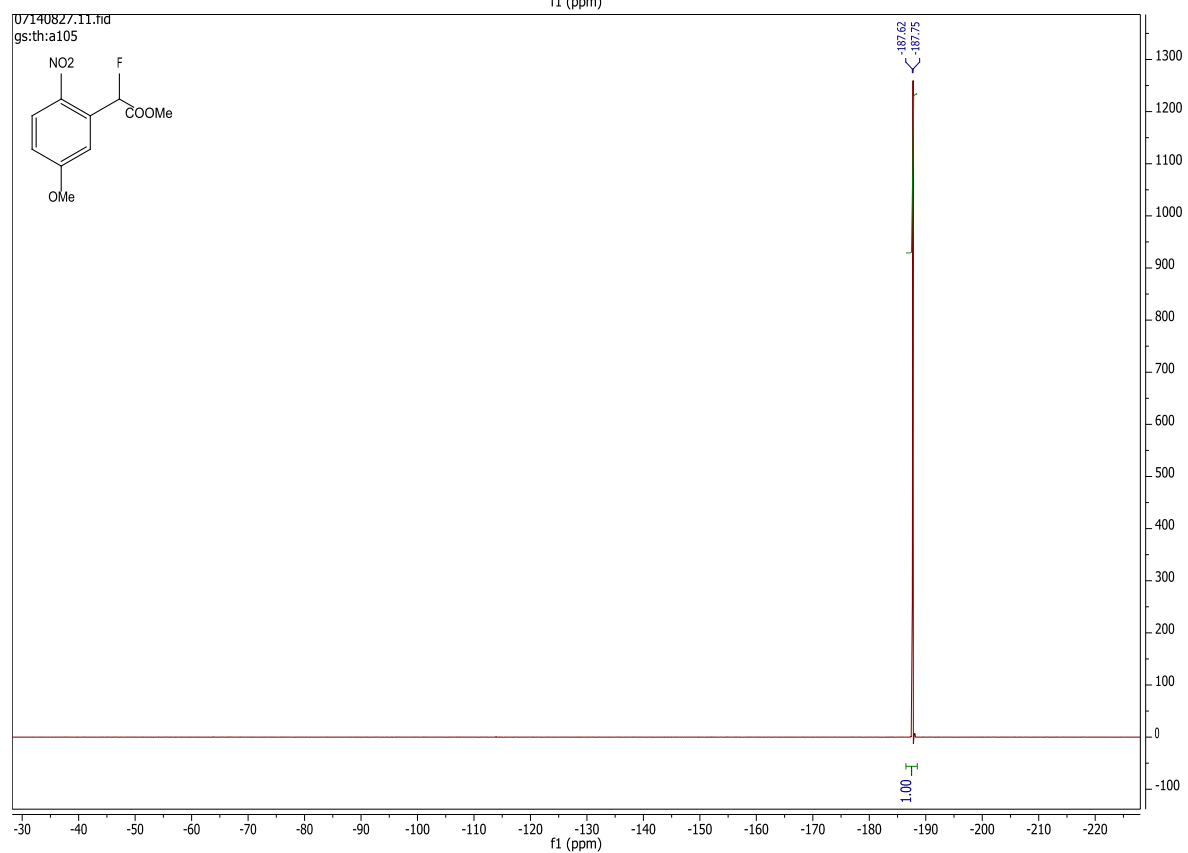

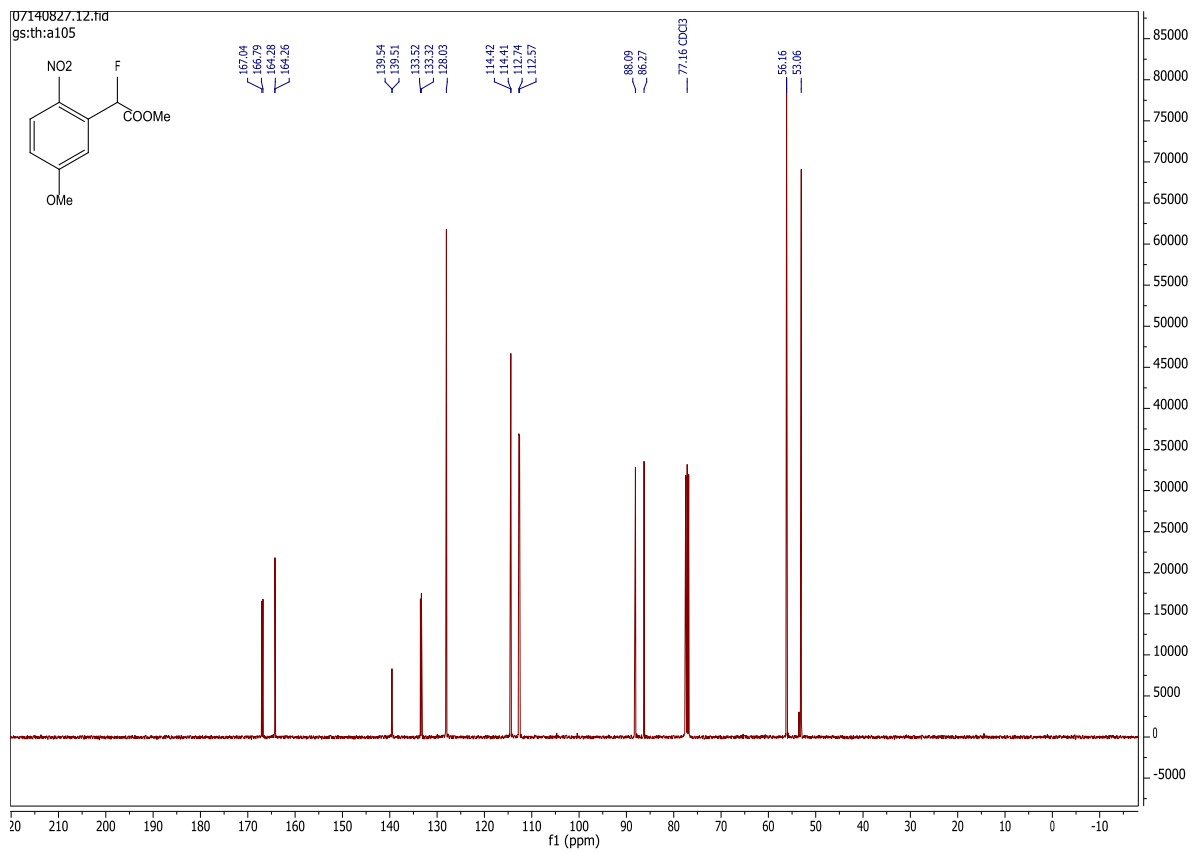

### 3-Fluorooxindole (**8a**)

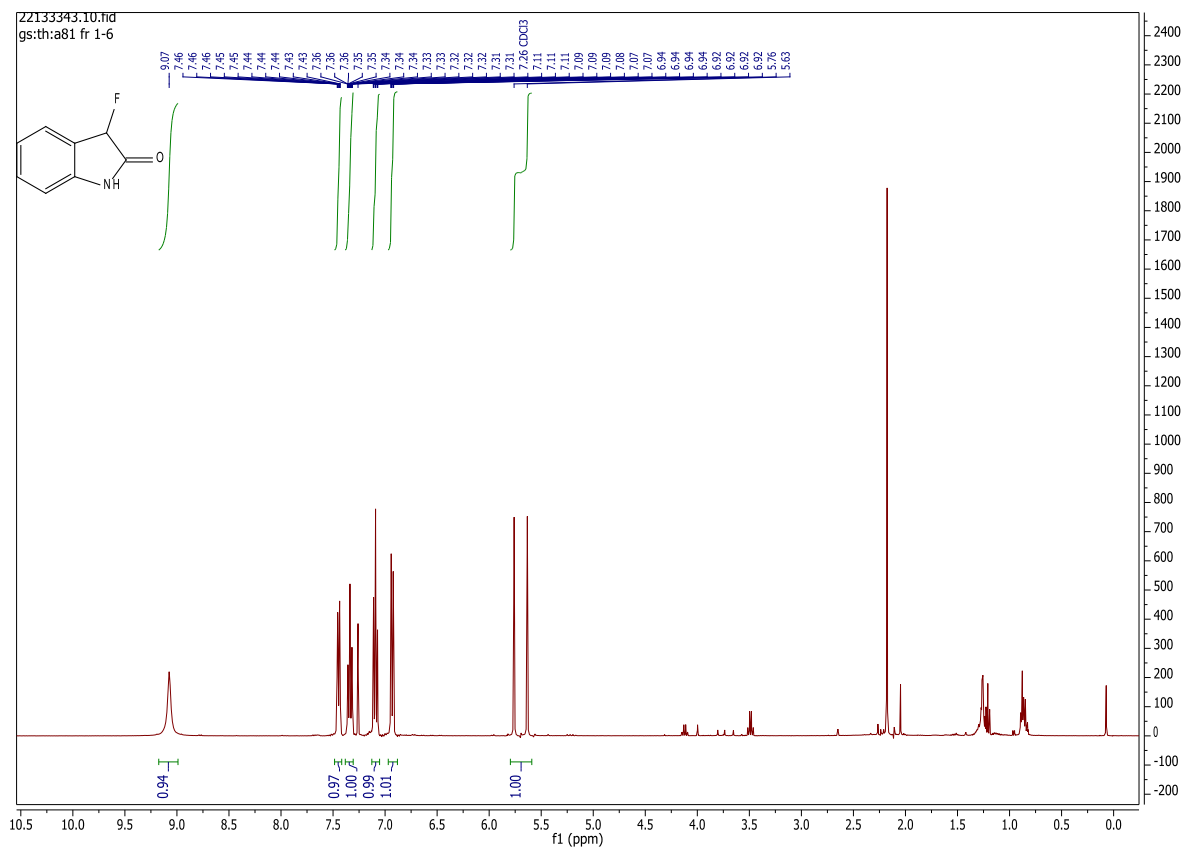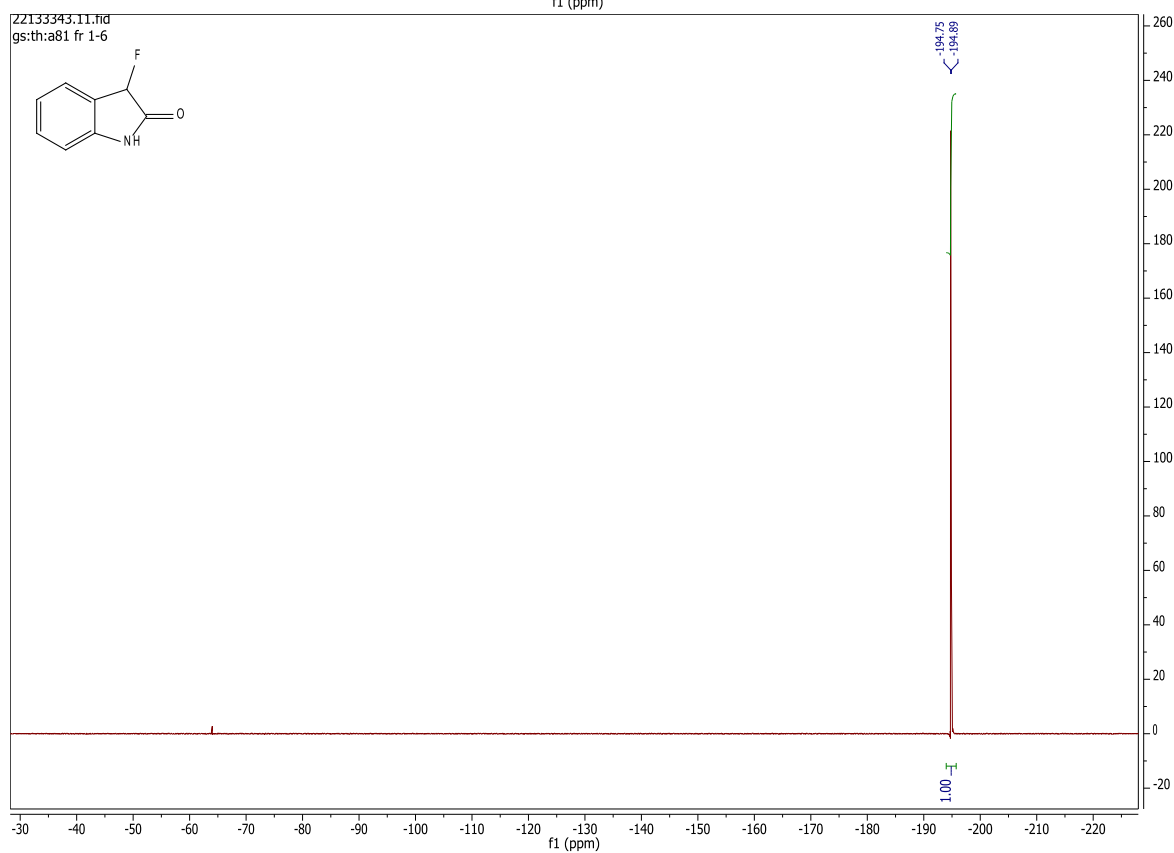

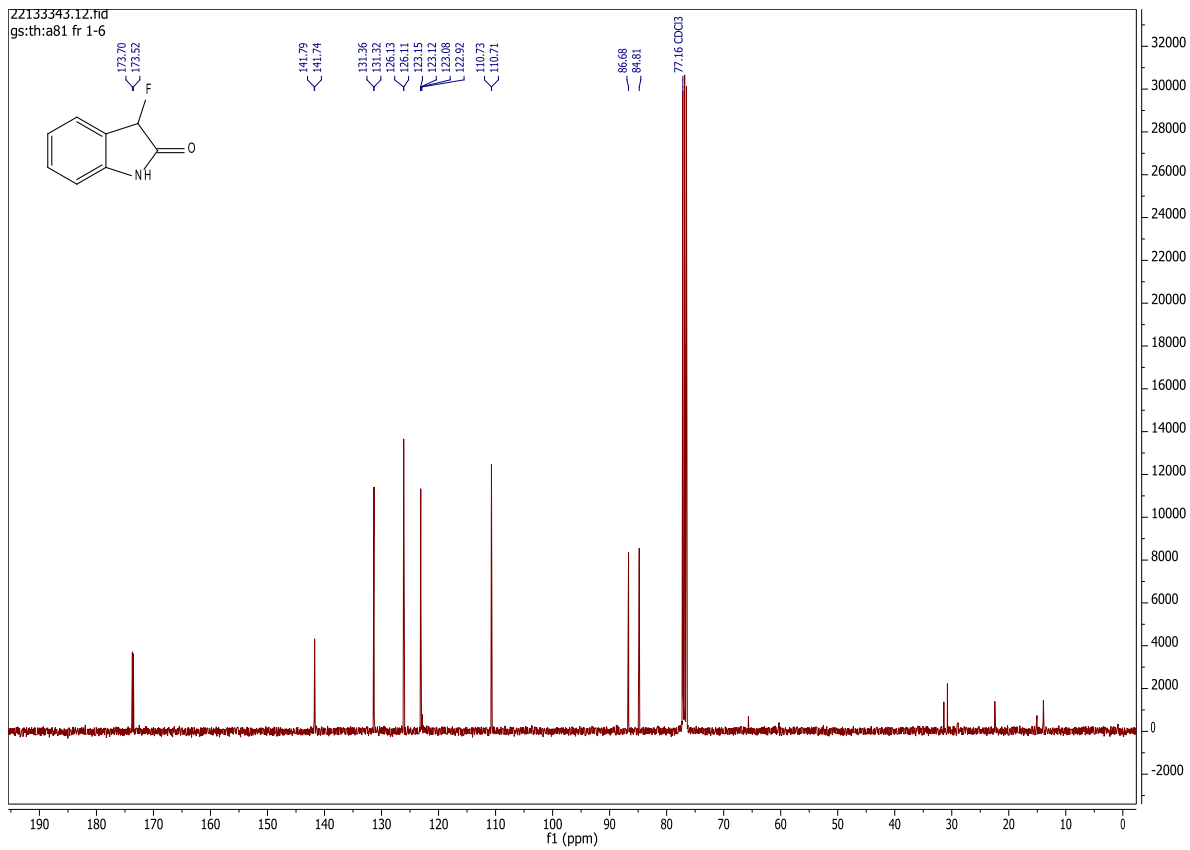

### 3-Fluoro-6-(trifluoromethyl)indole (**8b**)

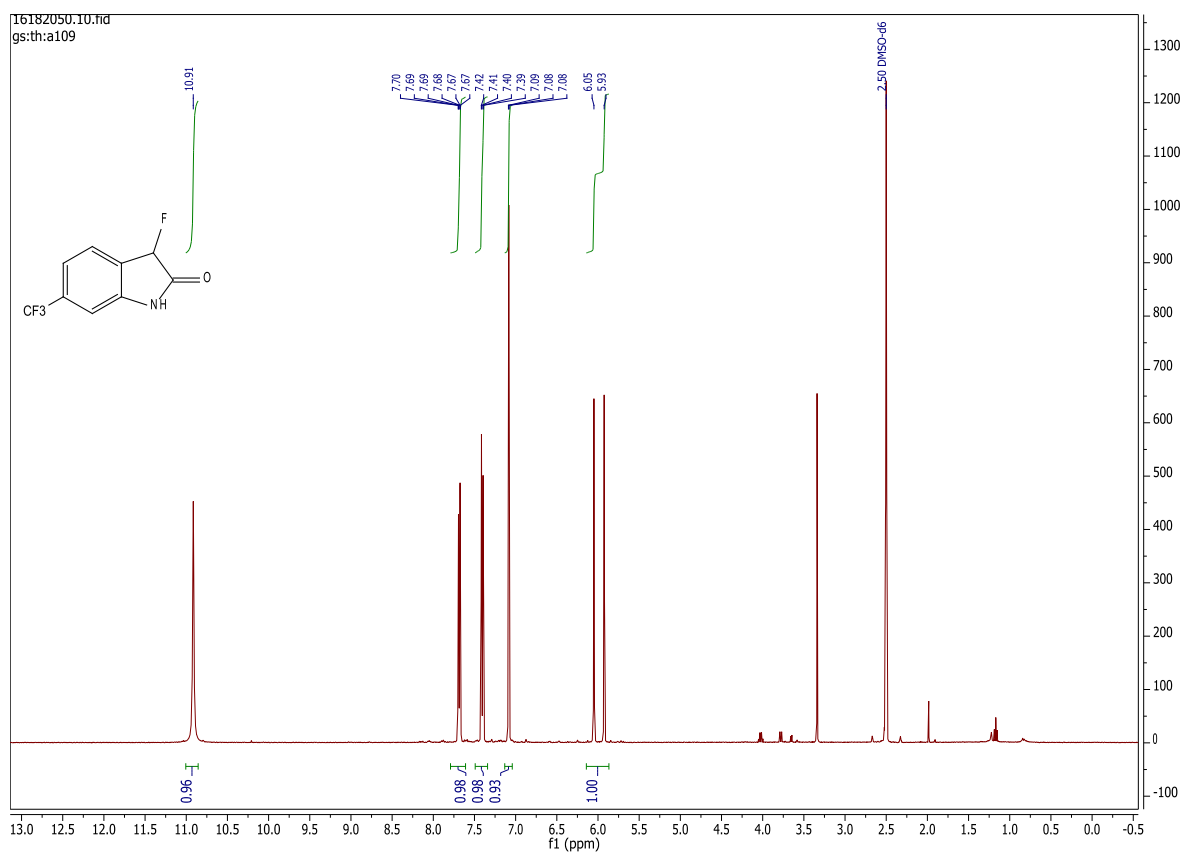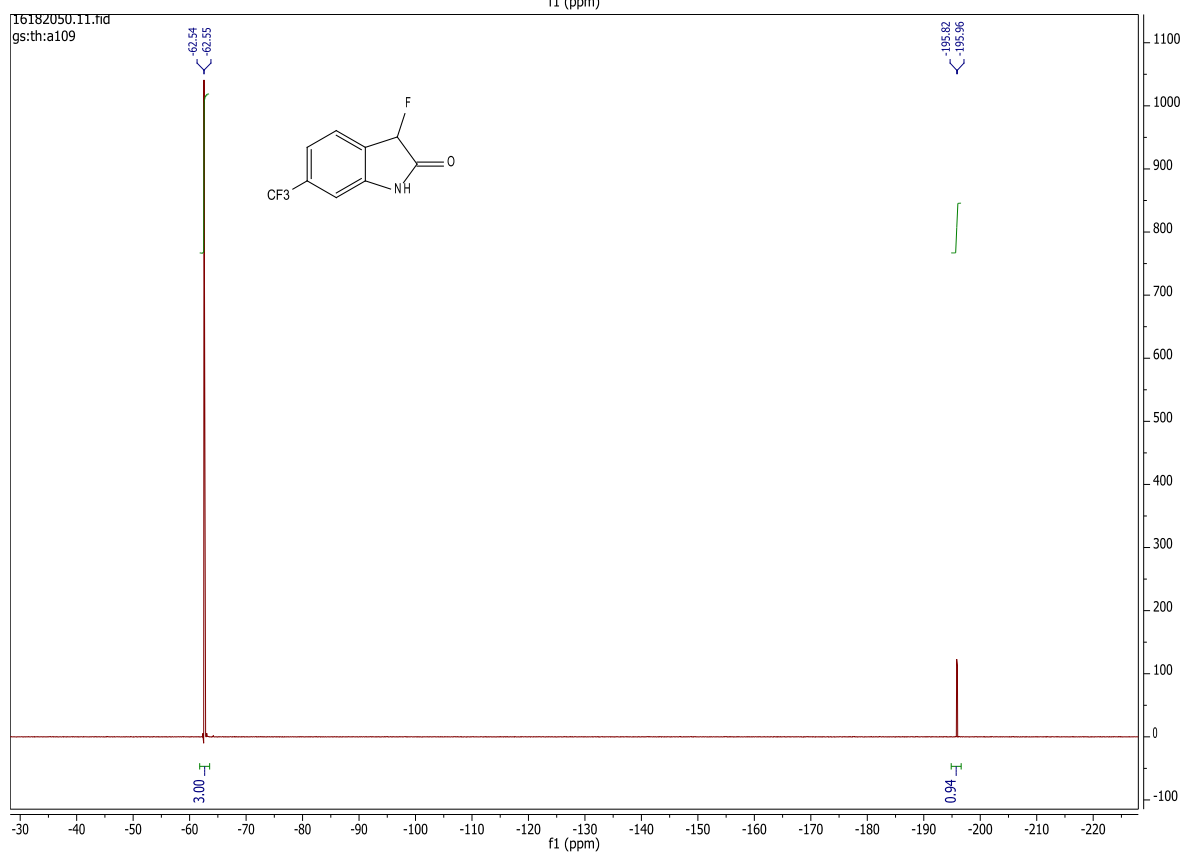

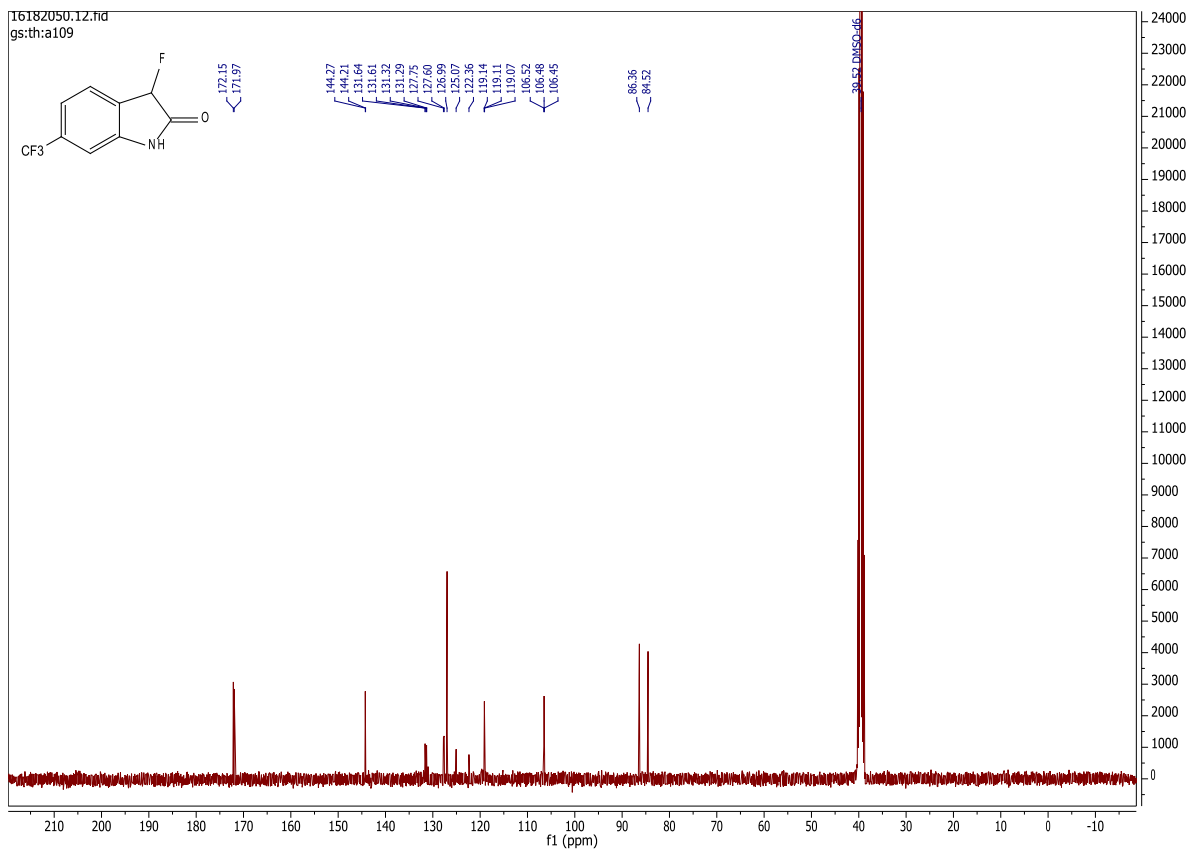

### 3-Fluoro-6-bromooxindole (8c)

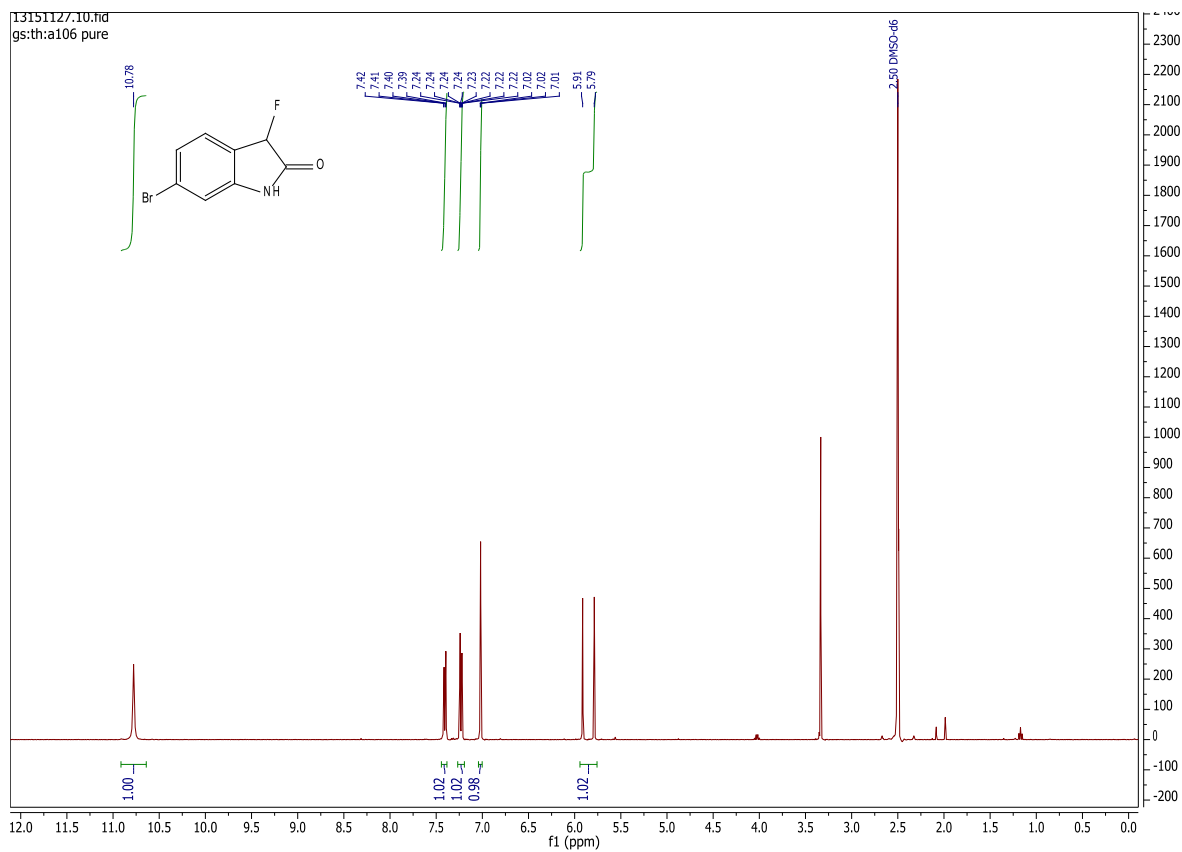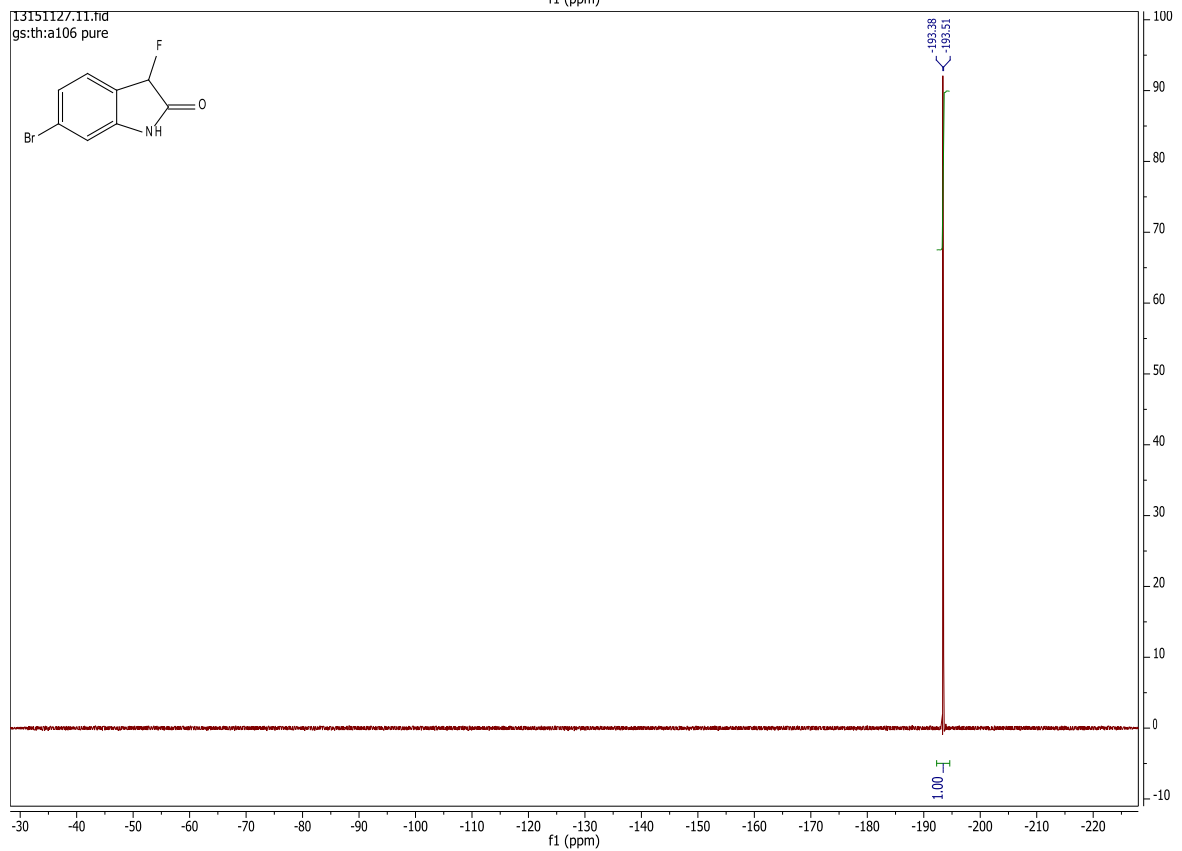

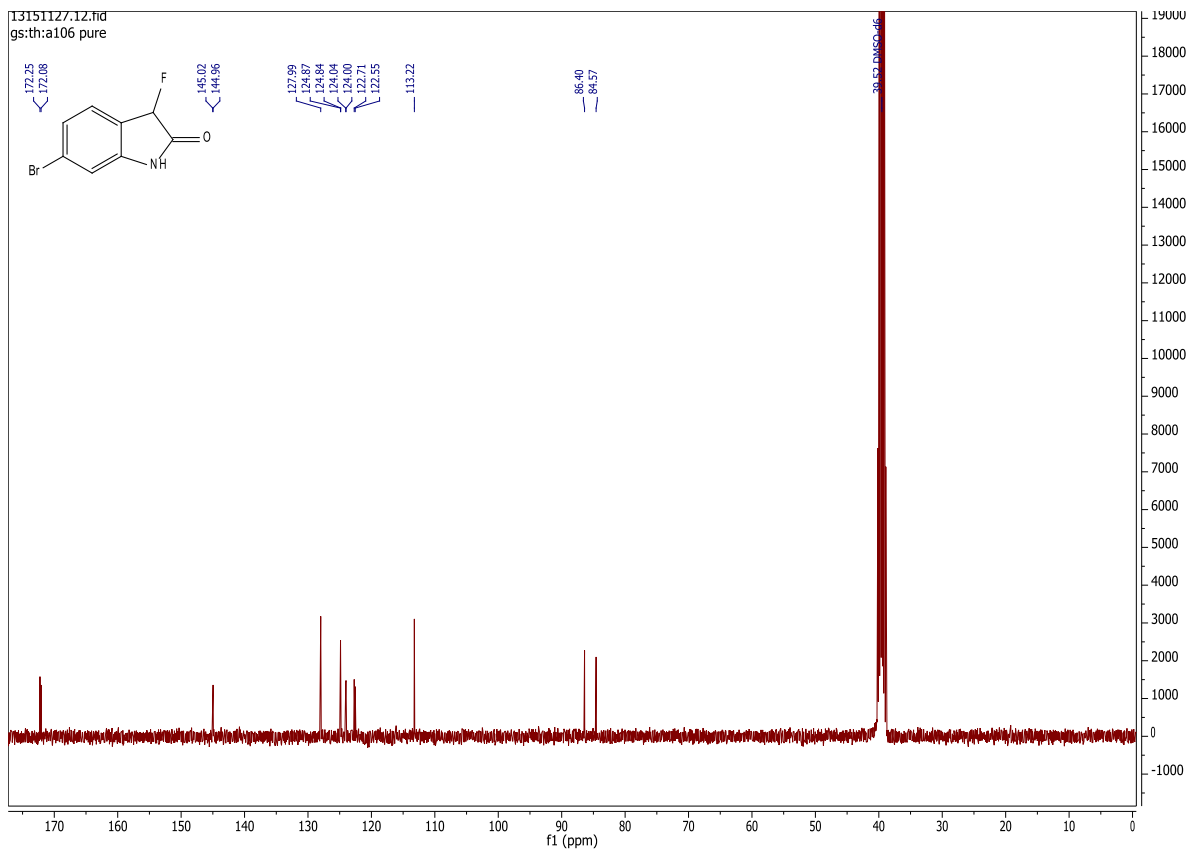



### 3-Fluoro-5-methoxyoxindole (**8e**)

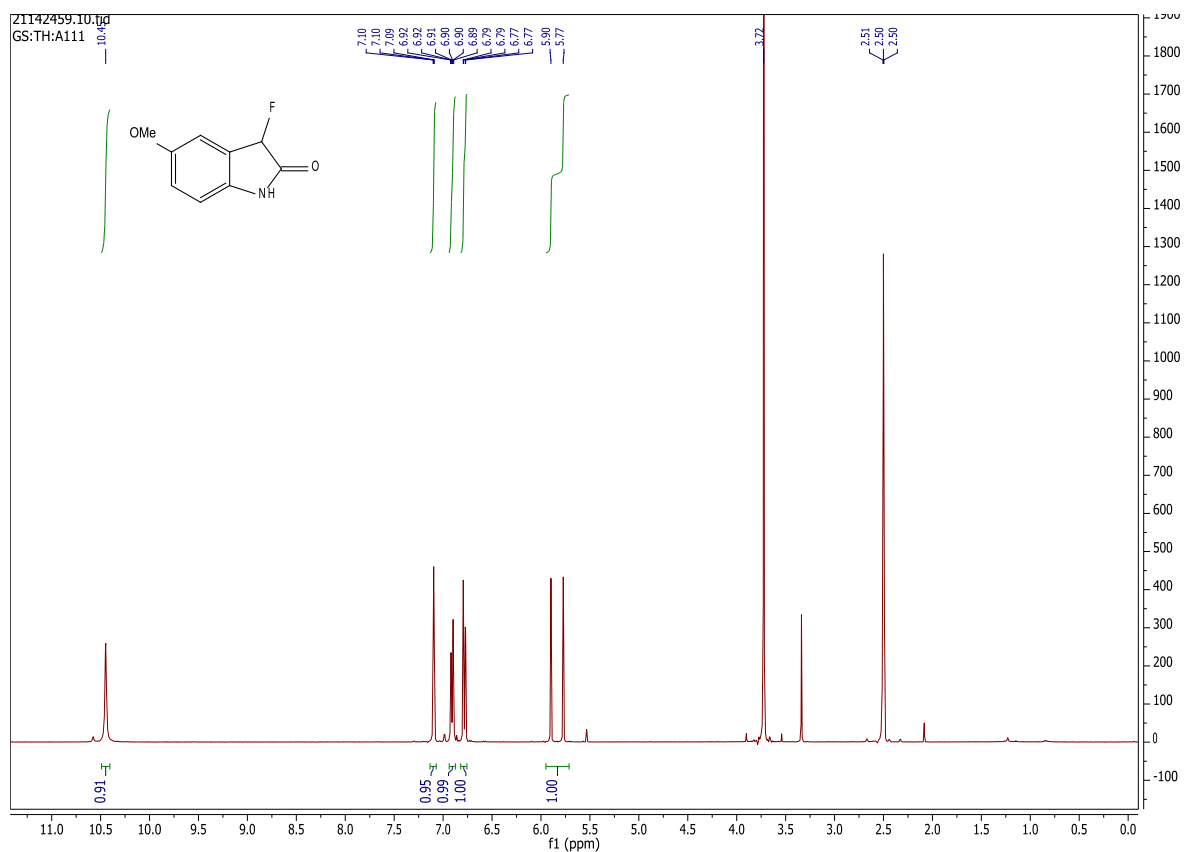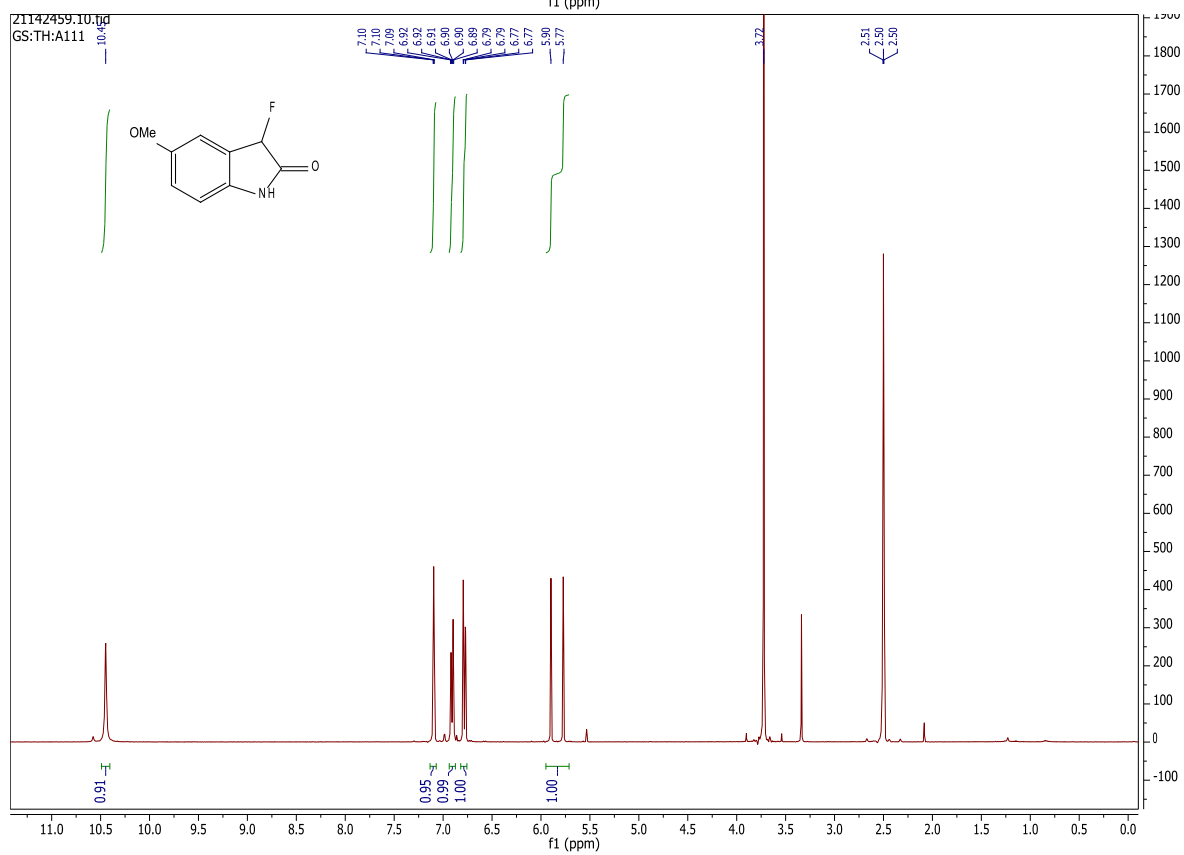

Z1142459.12.tif  
GS:TH:A111

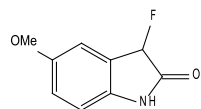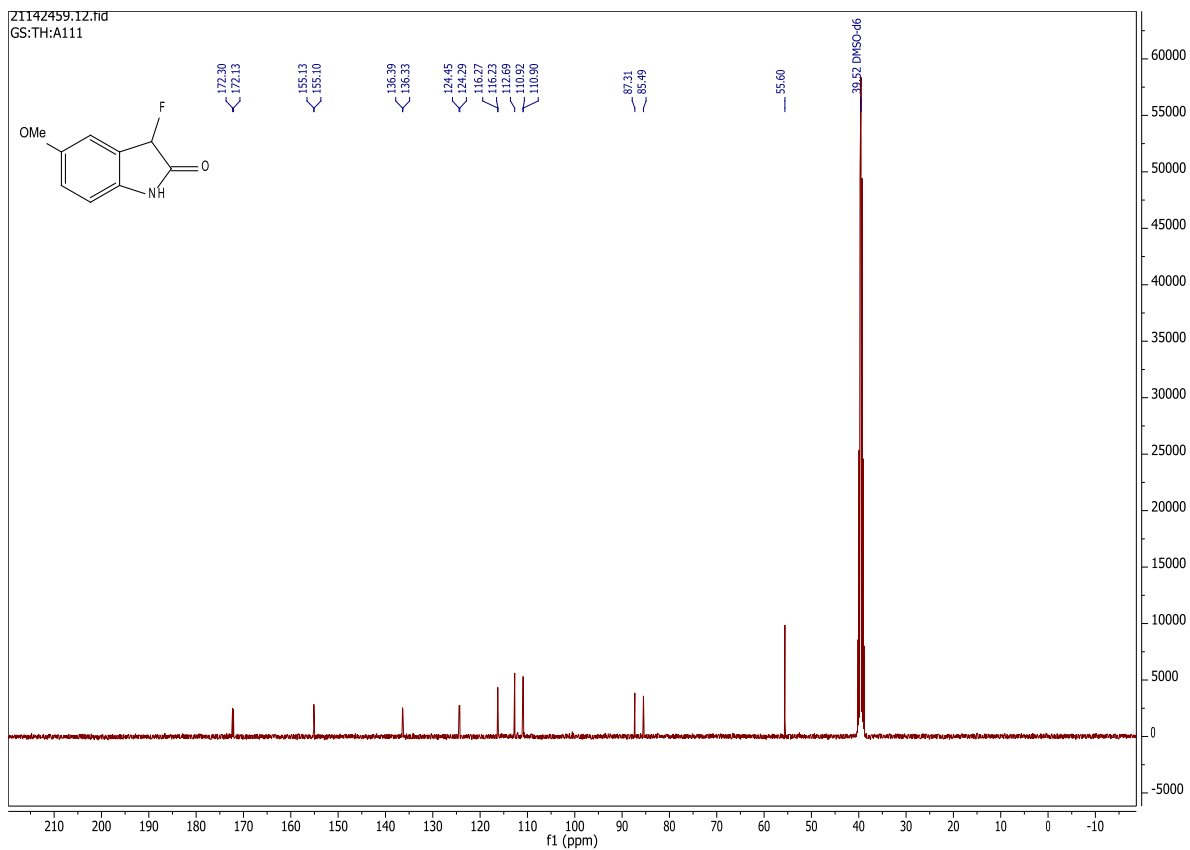

# 2,4-Dinitrobenzyl fluoride 5

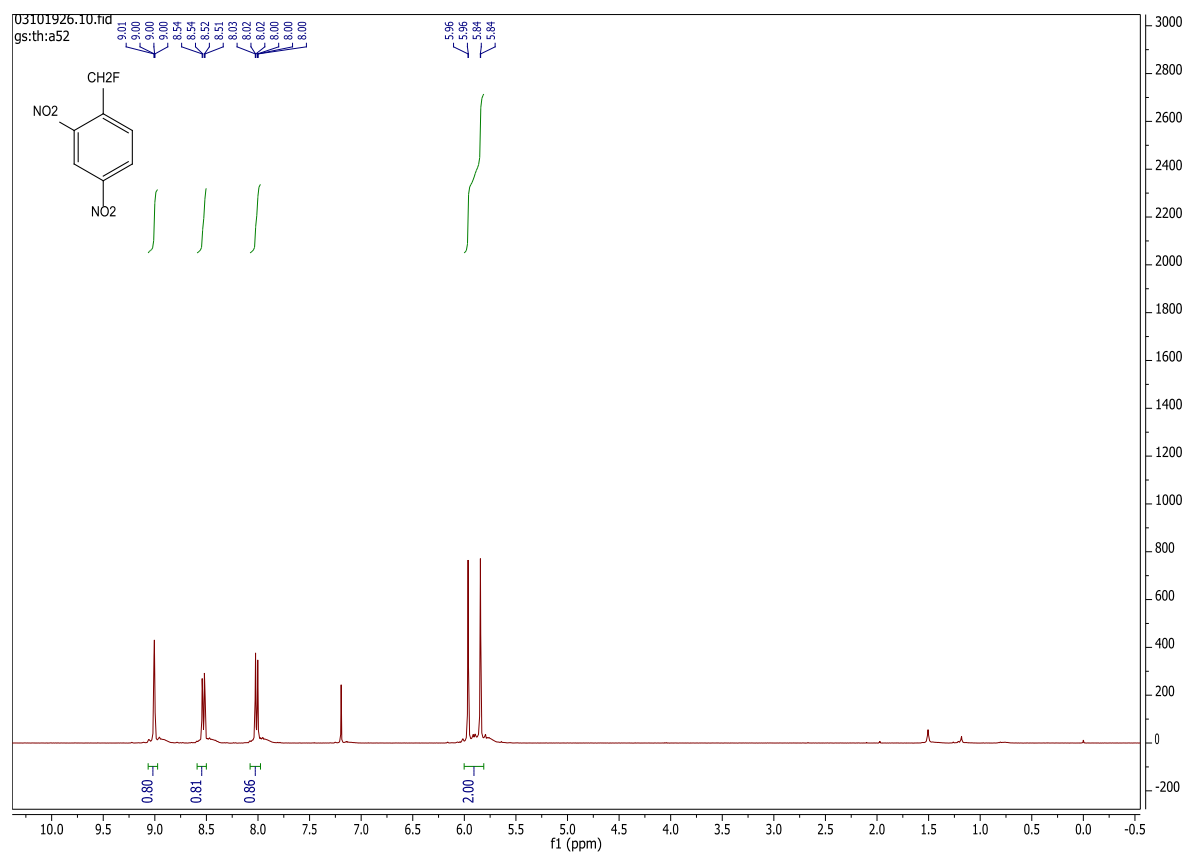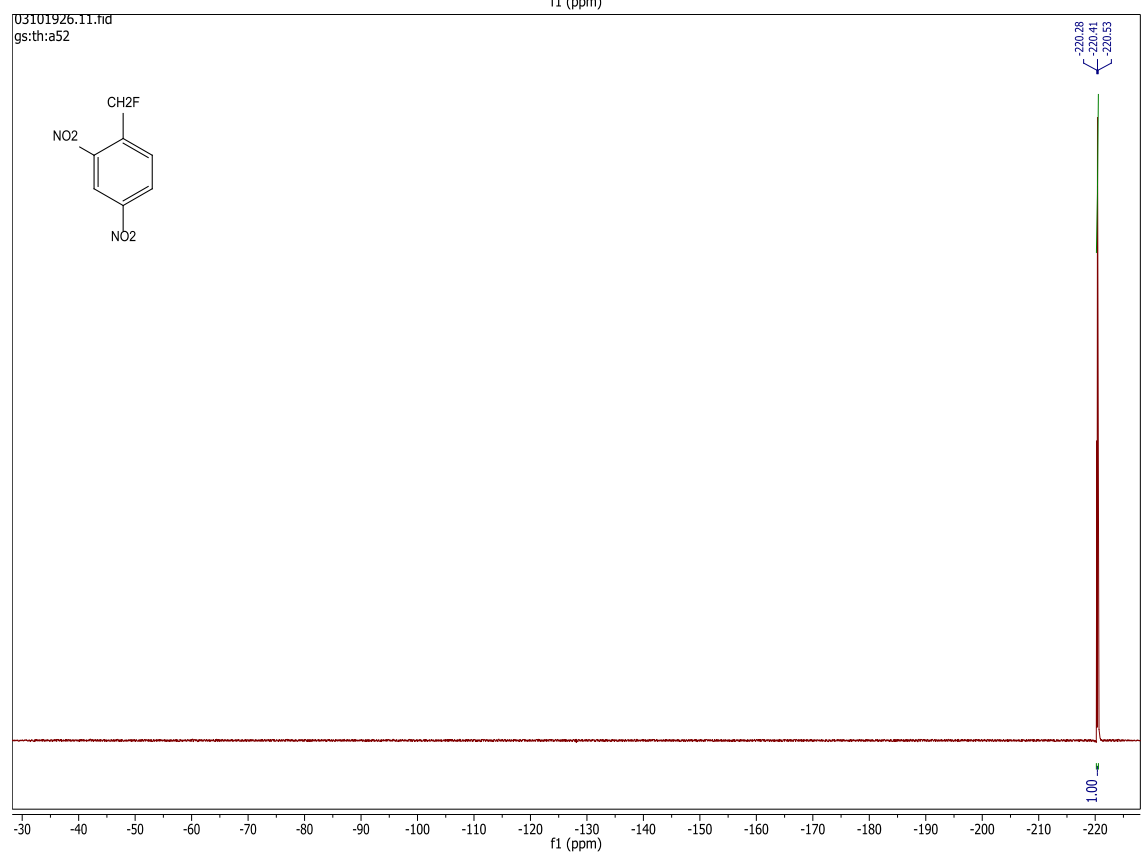

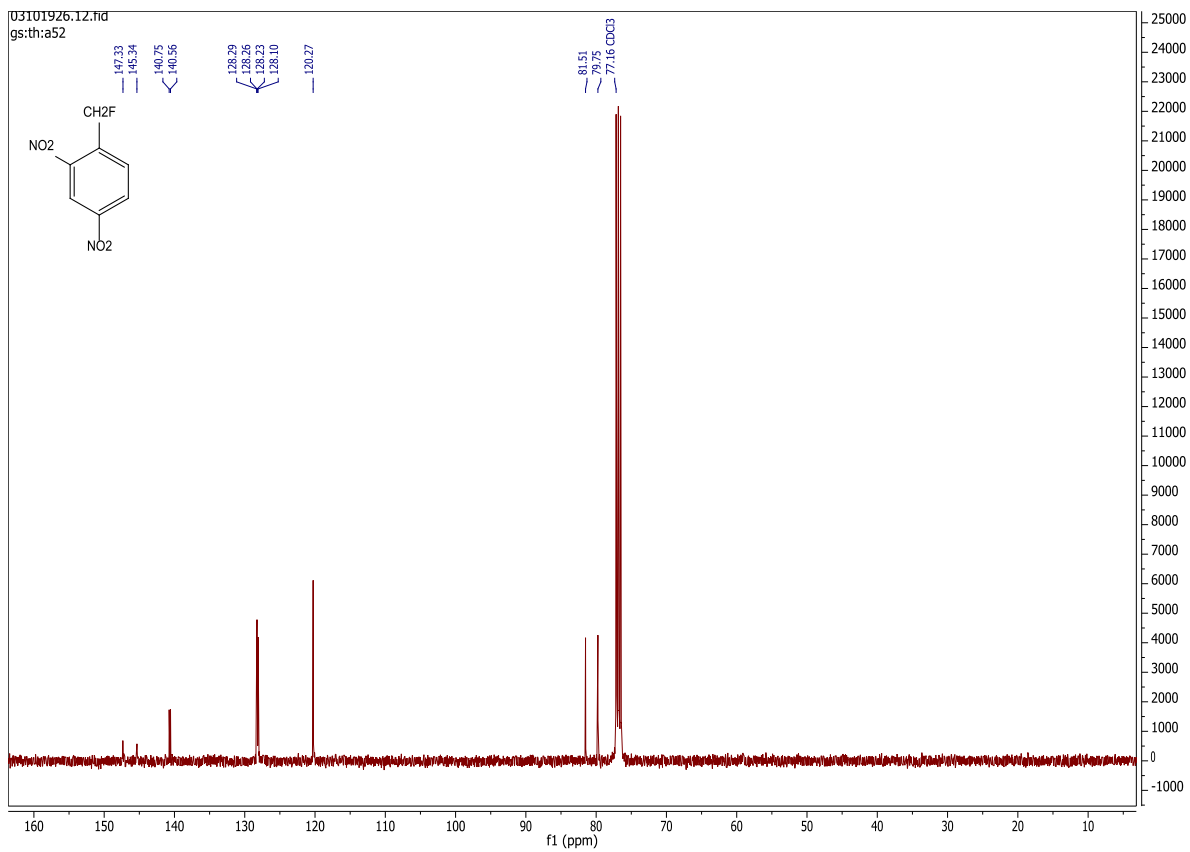

# 2-Fluoromethyl-3-nitropyridine (7)

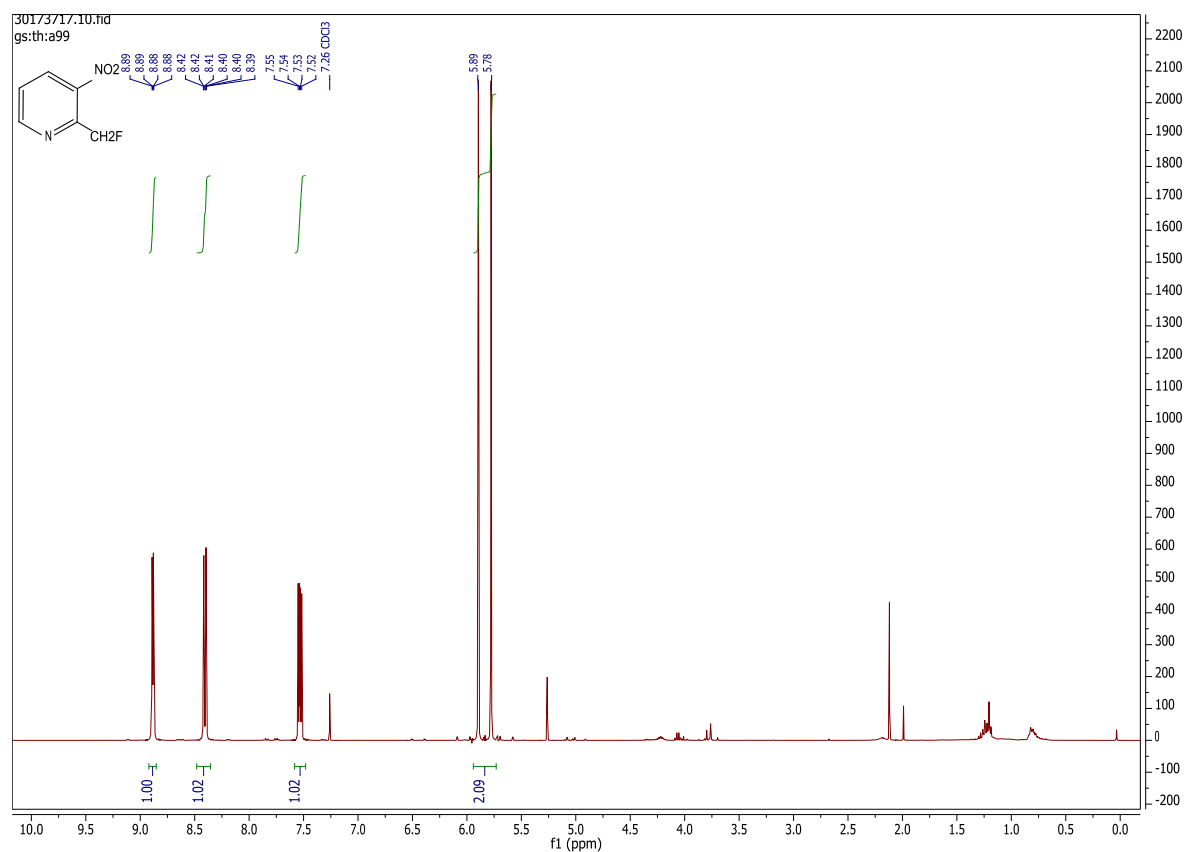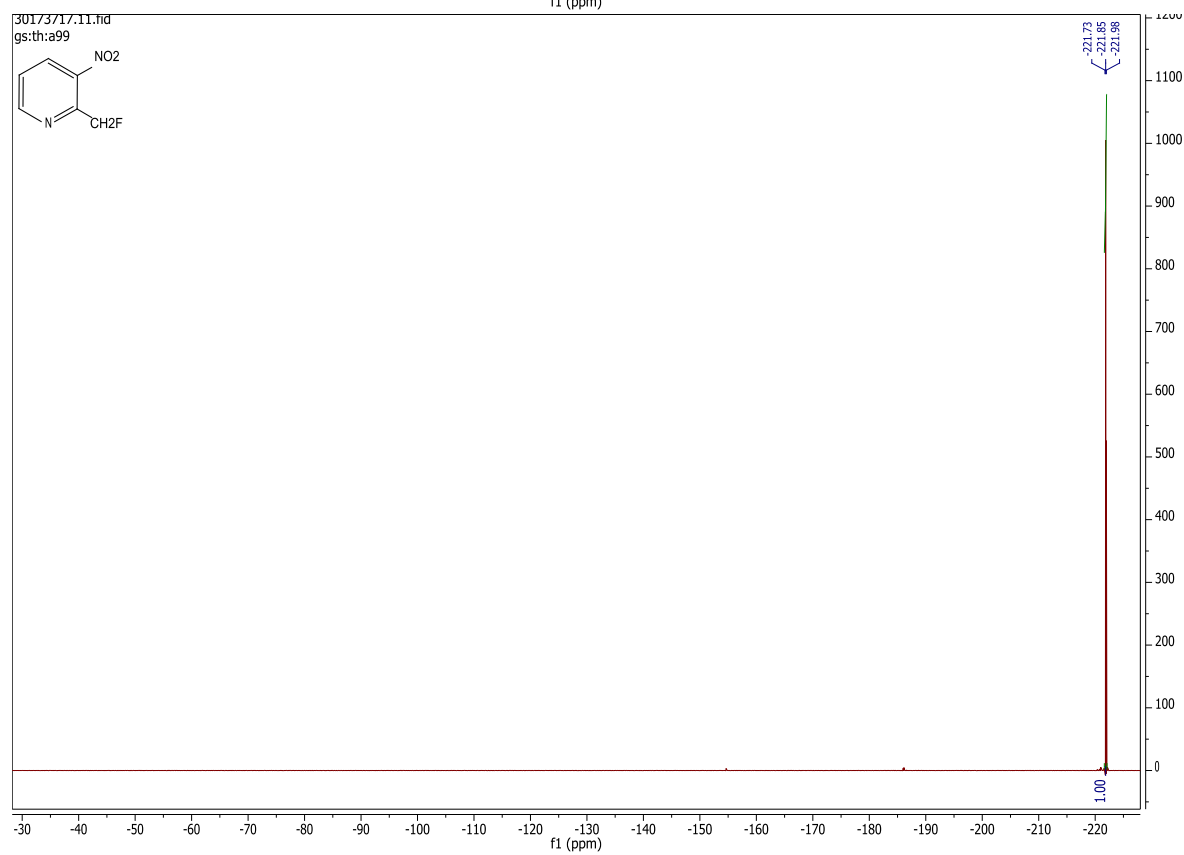

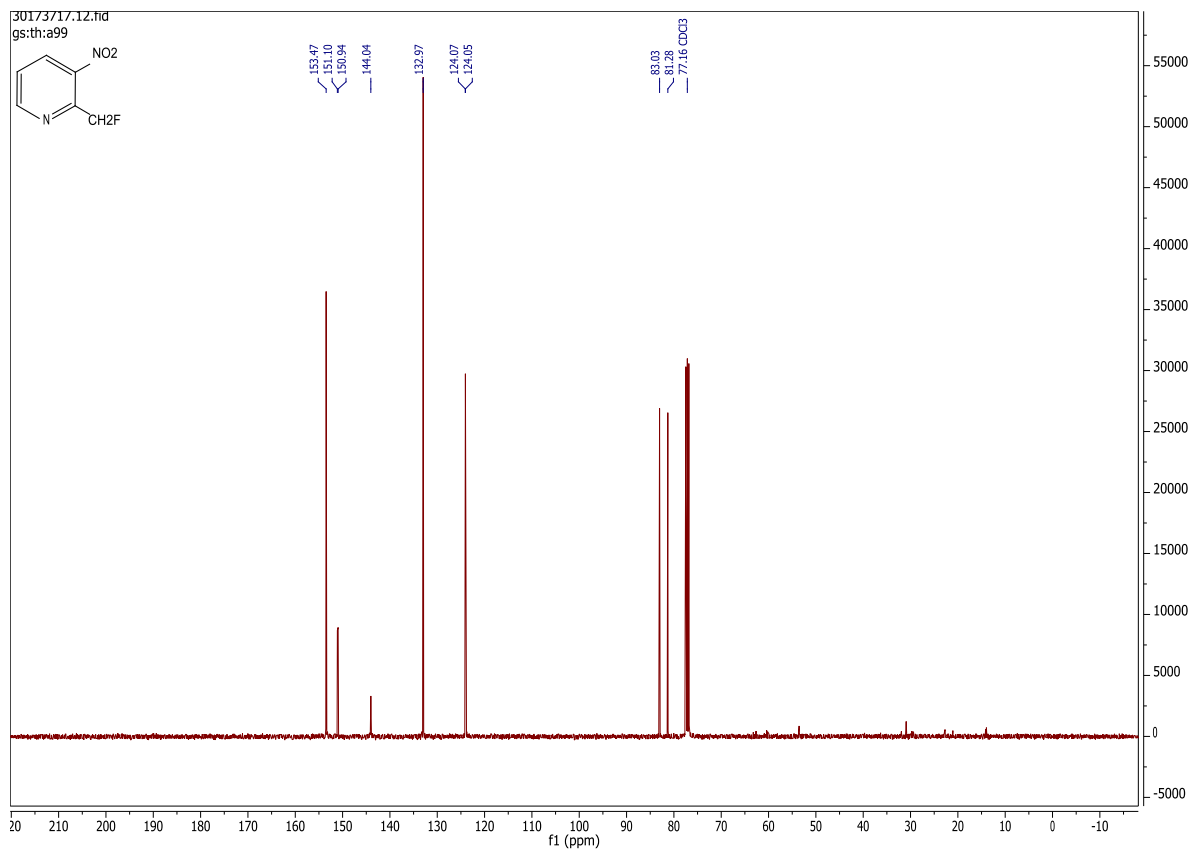

Supplement: Beilstein_J_Org_Chem-10-1213-s002.pdf [file Beilstein_J_Org_Chem-10-1213-s002.pdf]
